# Supplementary material for: Therapeutic coordination polymers: tailoring drug release through metal–ligand interactions
Source: Royal Society of Chemistry journal article supplement (doi:10.1039/d4sc00732h), 2024-01-01
Supplement: d4sc00732h1.pdf [file d4sc00732h1.pdf]

## Supporting Information

### Therapeutic Coordination Polymers: Tailoring Drug Release through Metal-Ligand Interactions

#### Table of Contents

|                                             |    |
|---------------------------------------------|----|
| General Comments .....                      | 2  |
| 1. Crystallographic Data .....              | 3  |
| 1.1 Crystal Structures .....                | 3  |
| 1.2 Table of Parameters .....               | 10 |
| 1.3 Packing Diagrams .....                  | 12 |
| 2. Infrared Spectroscopy .....              | 16 |
| 3. Powder X-Ray Diffraction .....           | 22 |
| 4. Thermogravimetric Analysis .....         | 31 |
| 5. Dissolution Data .....                   | 37 |
| 5.1 Calibration Curves .....                | 37 |
| 5.2 Tablet Dissolution .....                | 39 |
| 5.3 Intrinsic Dissolution Rates .....       | 42 |
| 6. Scanning Electron Microscopy (SEM) ..... | 48 |

## General Comments

Single-crystal X-ray diffraction data were collected on a Bruker D8 Venture diffractometer, with either a Cu microfocus X-ray source with 2D Montel multilayer optics or a Mo-sealed X-ray tube with a curved graphite monochromator. All crystals were collected at 170 K, except for **ZnDiclo6**, which was collected at 298 K due to extreme smearing of reflections at colder temperatures.

Powder X-ray diffractograms were collected with one of two XRD systems from PROTO Manufacturing; a PROTO AXRD Benchtop Powder Diffraction System using Cu K $\alpha_{\text{avg}}$  radiation with a DECTRIS Mythen silicon strip detector with an angular  $2\theta$  range of 4-50°, a step size of 0.015°, and a dwell time of 2 seconds or a PROTO High-throughput Laboratory Powder Diffractometer (LPD-HT) equipped with a Cu K $\alpha_{\text{avg}}$  microfocus X-ray source, 2D Montel focusing optics, and a DECTRIS 1M Eiger2 area detector with angular coverage of 45°  $2\theta$ .

Thermogravimetric analysis of materials was performed on a TA Instrument (TGA 5500). All samples were held isothermally for 10 minutes under N<sub>2</sub> before being heated at a rate of 10 °C per minute until a maximum temperature of 600 °C was reached.

IR spectra were collected using a Bruker Alpha FT-IR spectrometer equipped with a platinum single-reflection diamond ATR module. A PerkinElmer 2400 Series II Elemental Analyzer was used for elemental analysis. All UV-Vis samples were measured on an Agilent 8453 spectrophotometer.

Drug dissolution and intrinsic dissolution rates were obtained using a Varian VK 7000 pharmaceutical dissolution instrument connected to a VK8000 autosampler and peristaltic pump. Dissolution studies were performed using United States Pharmacopeia (USP) apparatus one (paddles) at 100 rpm. Approximately 30 mg of each TCP was compacted into a disc (5 mm diameter) under a pressure of 2 Tonnes for 2 min. A Varian VK 7000 pharmaceutical dissolution instrument was used to monitor the release of APIs. The TCP monolith was placed in a stainless-steel basket, attached to the spindle, and immersed in 900 mL of buffer solution at 37 °C. Aliquots (1.5 mL) were taken at different time intervals. The media was not replaced. The aliquots were analyzed by UV-Vis spectroscopy;  $\lambda_{\text{max}}$  276 nm for Diclofenac. The concentration of the API in each aliquot was determined using a calibration curve. The dissolution of the TCP was studied using 0.05 M phosphate buffer (pH 6.8), 0.01 M citrate buffer (pH 5.5), and 0.01 M citrate buffer with 0.05% of sodium dodecyl sulfate (pH 5.5).

Intrinsic dissolution rates were determined using a Woods apparatus (4.0 mm diameter) at 50 rpm using a Varian VK 7000 pharmaceutical dissolution instrument. Materials were pressed to 1.5 Tonnes for 1 min. 900 mL of buffer solution at 37 °C was used, and aliquots of 1.5 mL were taken at varying time intervals which were dependent on the material being analyzed. Concentrations were determined via UV-vis spectroscopy. Rates were determined from the slope of a linear concentration vs. time plot. Intrinsic dissolution of TCPs was studied using 0.05 M phosphate buffer (pH 6.8), and 0.05 M phosphate buffer with 0.05% EDTA (pH 6.8).

Cytotoxicity studies were performed with human non-fetal skin fibroblasts (NHF) (Coriell Institute for Medical Research, Cat. No. AG09309) which were grown at 5% CO<sub>2</sub> and 37 °C and cultured in Eagle's Minimum Essential Medium with Earle's salts and non-essential amino acids supplemented with 15% (v/v) fetal bovine serum (Thermo Scientific, Waltham, MA, USA) and 10 mg/mL gentamicin (Gibco BRL, VWR, Mississauga, ON, Canada). WST-1 assays were performed according to the manufacturer's protocol (Roche Applied Sciences, Indianapolis, IN, USA) to examine cell viability following TCP treatment. Briefly, NHF cells seeded on 96-well cell culture plates were treated for 48 h and incubated with WST-1 reagent for 3 h in the absence of light. The proportion of metabolically active cells was observed by detecting formazan through absorbance readings at 450 nm on a Wallac Victor3 1420 Multilabel Counter (PerkinElmer, Waltham, MA, USA). Microscopic imaging was conducted with a Leica DMI6000 B inverted microscope (Leica Microsystems, Concord, ON, Canada), following the addition of 10 µM Hoechst nuclear stain. Statistical analysis was conducted with GraphPad Prism 6 statistical software, where values of  $P < 0.05$  were taken as significant. A 2-way analysis of variance with Dunnett's test was utilized and sample means were compared to DMSO controls.

Scanning electron microscopy (SEM) images were collected using a Quanta 200 FEG instrument from FEI Company under low-vacuum conditions. Note: pores/holes observed in the images are from the background tape used to mount the samples and are not reflective of the sample.

## 1. Crystallographic Data

### 1.1 Crystal Structures

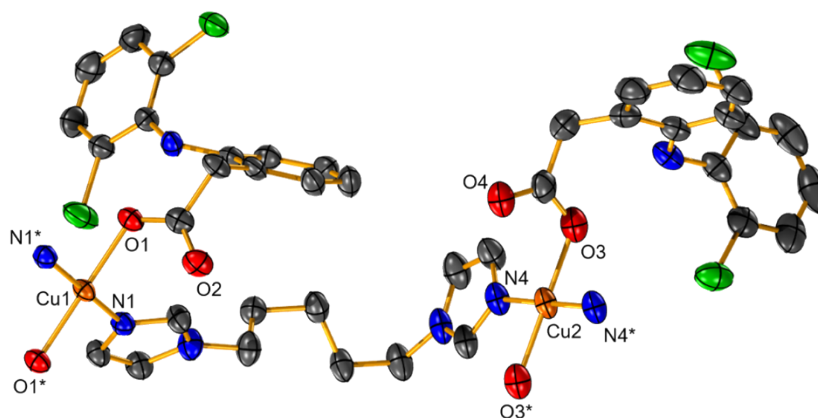

Figure S1: Coordination environments of the Cu(II) ions in Cu(Diclo)<sub>2</sub>(biim-5). Ellipsoids shown at 50% probability and H atoms omitted for clarity..

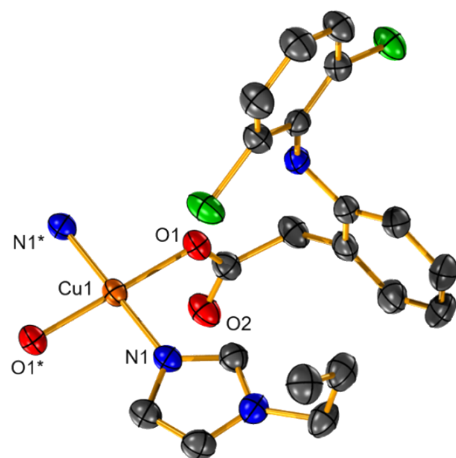

Figure S2: Coordination environment of the Cu(II) ion in  $\text{Cu}(\text{Diclo})_2(\text{biim-6}) \cdot (\text{MeOH})_2$ . Ellipsoids shown at 50% probability and H atoms and solvent omitted for clarity.

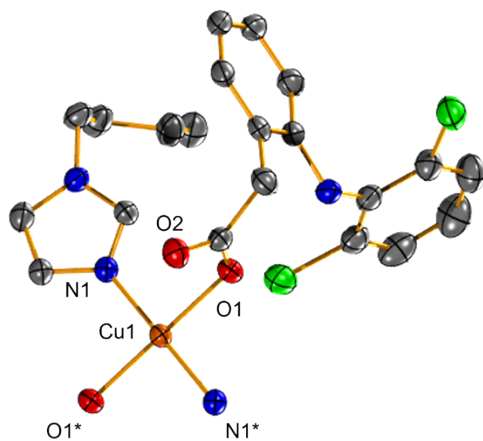

Figure S3: Coordination environment of the Cu(II) ion in  $\text{Cu}(\text{Diclo})_2(\text{biim-8}) \cdot (\text{MeOH})_2$ . Ellipsoids shown at 50% probability. H atoms and solvent omitted for clarity.



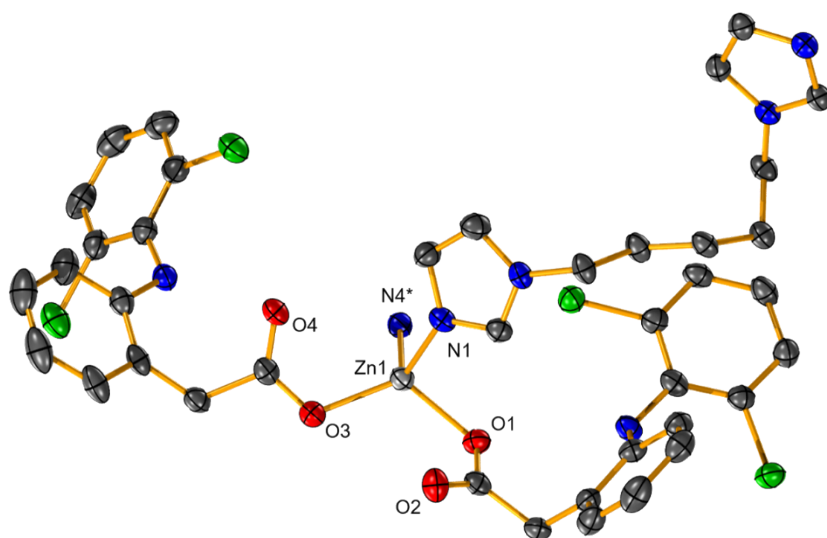

Figure S4: Coordination environment of the Zn(II) ion in Zn(Diclo)<sub>2</sub>(biim-5). Ellipsoids shown at 50% probability and H atoms omitted for clarity.

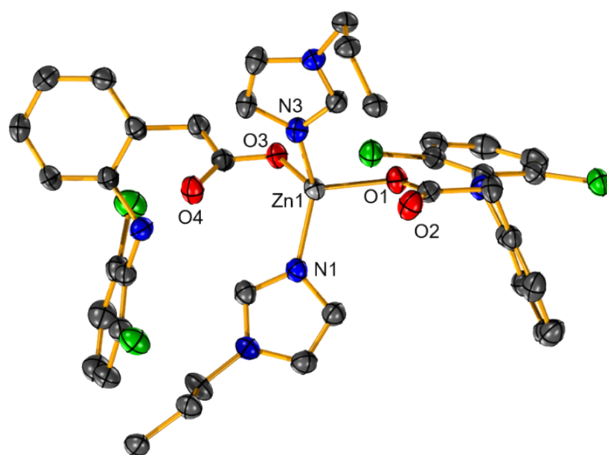

Figure S5: Coordination environment of the Zn(II) ion in Zn(Diclo)<sub>2</sub>(biim-6)·(MeOH). Ellipsoids shown at 50% probability. H atoms and solvent omitted for clarity.

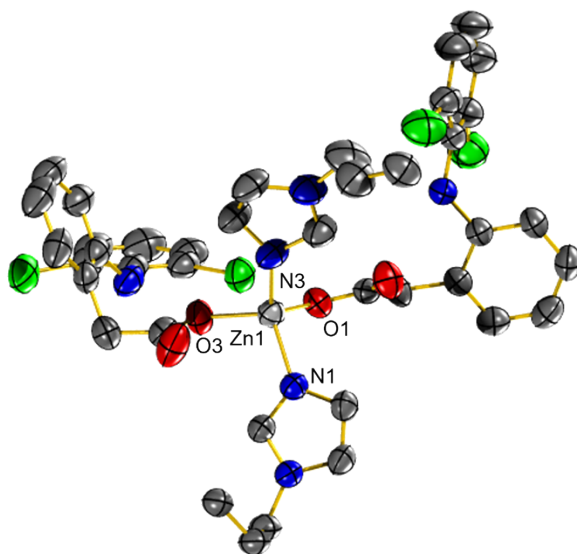

Figure S6: Coordination environment of the Zn(II) ion in  $\text{Zn(Diclo)}_2(\text{biim-6}) \cdot (\text{EtOH})$ . Ellipsoids shown at 50% probability. H atoms and solvent omitted for clarity.

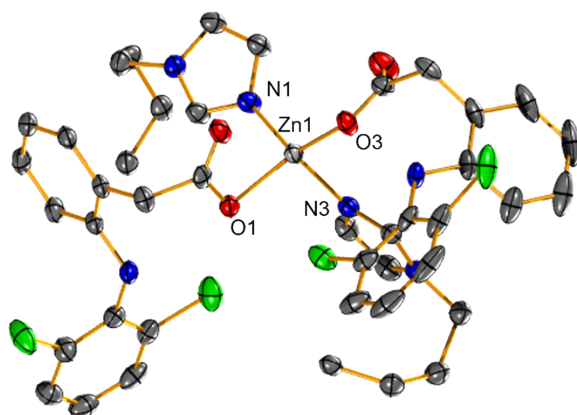

Figure S7: Coordination environment of the Zn(II) ion in  $\text{Zn(Diclo)}_2(\text{biim-8})$ . Ellipsoids shown at 50% probability and H atoms omitted for clarity.

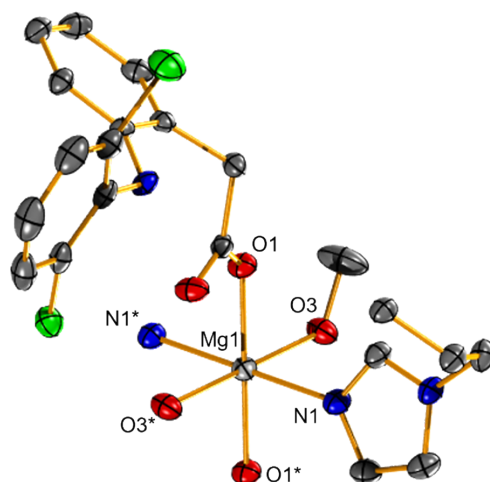

Figure S8: Coordination environment of the Mg(II) ion in  $\text{Mg}(\text{Diclo})_2(\text{biim-6})_2(\text{MeOH})_2$ . Ellipsoids shown at 50% probability and H atoms omitted for clarity.

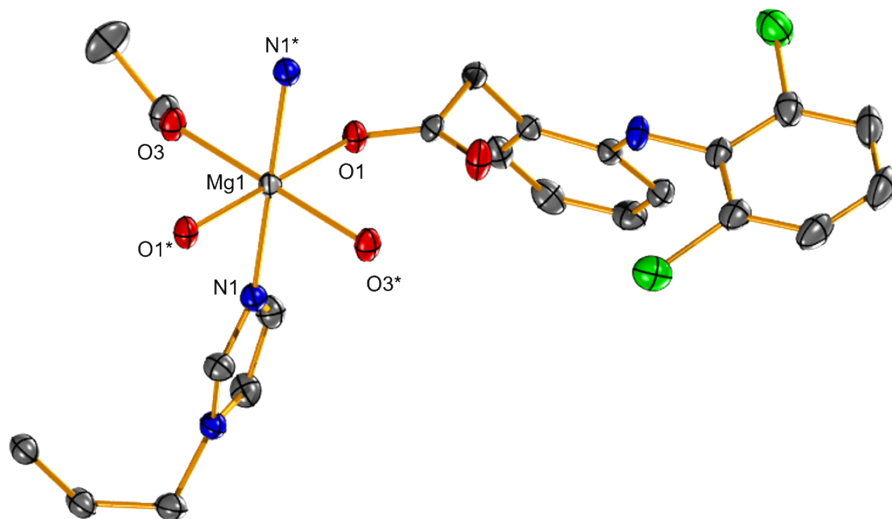

Figure S9: Coordination environment of the Mg(II) ion in  $\text{Mg}(\text{Diclo})_2(\text{biim-6})_2(\text{EtOH})_2$ . Ellipsoids shown at 50% probability and H atoms omitted for clarity.

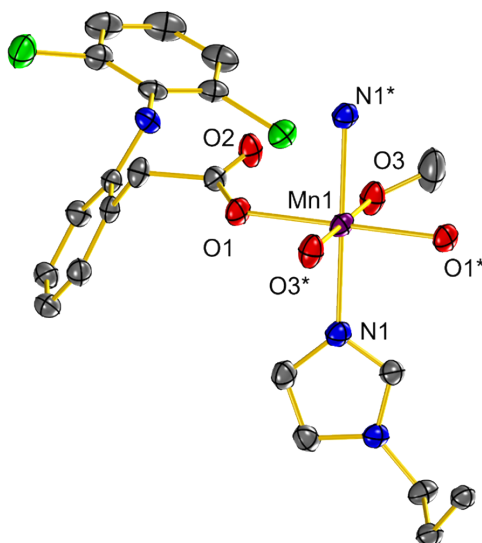

Figure S10: Coordination environment of the Mn(II) ion in  $\text{Mn}(\text{Diclo})_2(\text{biim-6})_2(\text{MeOH})_2$ . Ellipsoids shown at 50% probability and H atoms omitted for clarity.

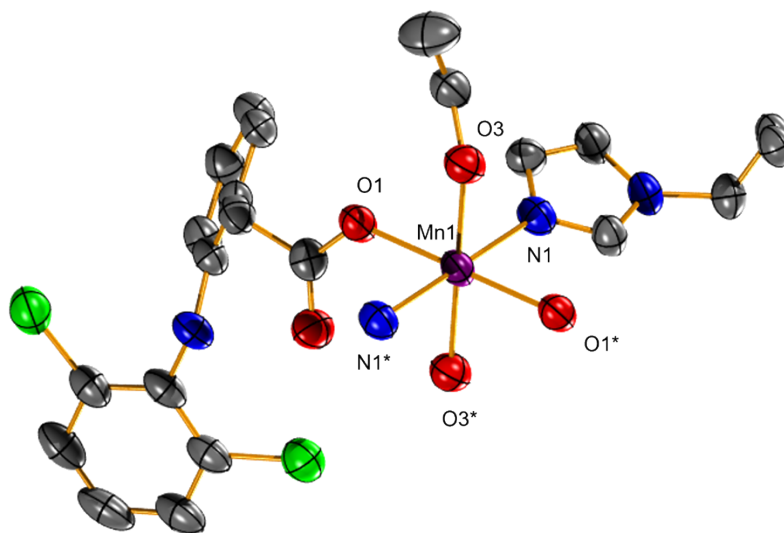

Figure S11: Coordination environment of the Mn(II) ion in  $\text{Mn}(\text{Diclo})_2(\text{biim-6})_2(\text{EtOH})_2$ . Ellipsoids shown at 50% probability and H atoms omitted for clarity.

## 1.2 Table of Parameters

|                                             | CuDiclo5                                                                        | CuDiclo6·MeOH                                                                   | CuDiclo8·MeOH                                                                   | ZnDiclo5                                                                         | ZnDiclo6·MeOH                                                                    |
|---------------------------------------------|---------------------------------------------------------------------------------|---------------------------------------------------------------------------------|---------------------------------------------------------------------------------|----------------------------------------------------------------------------------|----------------------------------------------------------------------------------|
| CCDC deposition number                      | 2237930                                                                         | 2237929                                                                         | 2237924                                                                         | 2237931                                                                          | 2237932                                                                          |
| Empirical formula                           | C <sub>39</sub> H <sub>36</sub> Cl <sub>4</sub> CuN <sub>6</sub> O <sub>4</sub> | C <sub>42</sub> H <sub>46</sub> Cl <sub>4</sub> CuN <sub>6</sub> O <sub>6</sub> | C <sub>44</sub> H <sub>50</sub> Cl <sub>4</sub> CuN <sub>6</sub> O <sub>6</sub> | C <sub>39</sub> H <sub>36</sub> Cl <sub>4</sub> N <sub>6</sub> O <sub>4</sub> Zn | C <sub>41</sub> H <sub>42</sub> Cl <sub>4</sub> N <sub>6</sub> O <sub>5</sub> Zn |
| Formula weight                              | 858.08                                                                          | 936.19                                                                          | 964.24                                                                          | 859.91                                                                           | 905.97                                                                           |
| Crystal system                              | monoclinic                                                                      | monoclinic                                                                      | triclinic                                                                       | monoclinic                                                                       | monoclinic                                                                       |
| Space group                                 | P2 <sub>1</sub> /c                                                              | P2 <sub>1</sub> /n                                                              | P-1                                                                             | P2 <sub>1</sub> /n                                                               | P2 <sub>1</sub> /n                                                               |
| a/Å                                         | 21.7971(5)                                                                      | 8.1316(3)                                                                       | 8.1744(3)                                                                       | 15.7556(3)                                                                       | 14.7461(3)                                                                       |
| b/Å                                         | 8.3133(2)                                                                       | 10.8394(3)                                                                      | 11.9929(5)                                                                      | 15.5699(3)                                                                       | 14.5959(3)                                                                       |
| c/Å                                         | 21.5270(6)                                                                      | 24.3849(7)                                                                      | 13.8763(6)                                                                      | 16.1773(3)                                                                       | 19.2358(3)                                                                       |
| α/°                                         | 90                                                                              | 90                                                                              | 68.678(2)                                                                       | 90                                                                               | 90                                                                               |
| β/°                                         | 90.584(2)                                                                       | 97.503(3)                                                                       | 77.480(2)                                                                       | 109.828(2)                                                                       | 97.599(2)                                                                        |
| γ/°                                         | 90                                                                              | 90                                                                              | 81.887(2)                                                                       | 90                                                                               | 90                                                                               |
| Volume/Å <sup>3</sup>                       | 3900.62(17)                                                                     | 2130.92(12)                                                                     | 1234.20(9)                                                                      | 3733.23(13)                                                                      | 4103.81(14)                                                                      |
| Z                                           | 4                                                                               | 2                                                                               | 1                                                                               | 4                                                                                | 4                                                                                |
| ρ <sub>calc</sub> /g/cm <sup>3</sup>        | 1.461                                                                           | 1.459                                                                           | 1.297                                                                           | 1.530                                                                            | 1.466                                                                            |
| μ/mm <sup>-1</sup>                          | 3.714                                                                           | 3.482                                                                           | 3.021                                                                           | 3.968                                                                            | 3.657                                                                            |
| F(000)                                      | 1764.0                                                                          | 970.0                                                                           | 501.0                                                                           | 1768.0                                                                           | 1872.0                                                                           |
| Crystal size/mm <sup>3</sup>                | 0.3 × 0.2 × 0.1                                                                 | 0.3 × 0.2 × 0.05                                                                | 0.5 × 0.2 × 0.03                                                                | 0.2 × 0.2 × 0.1                                                                  | 0.4 × 0.4 × 0.2                                                                  |
| 2θ range for data collection/°              | 8.112 to 133.192                                                                | 7.314 to 133.19                                                                 | 6.95 to 149.562                                                                 | 6.768 to 136.498                                                                 | 7.118 to 148.996                                                                 |
| Index ranges                                | -25 ≤ h ≤ 25, -9 ≤ k ≤ 9, -24 ≤ l ≤ 25                                          | -9 ≤ h ≤ 8, -12 ≤ k ≤ 12, -29 ≤ l ≤ 29                                          | -10 ≤ h ≤ 10, -14 ≤ k ≤ 14, -17 ≤ l ≤ 17                                        | -18 ≤ h ≤ 18, -18 ≤ k ≤ 18, -19 ≤ l ≤ 19                                         | -17 ≤ h ≤ 18, -18 ≤ k ≤ 18, -24 ≤ l ≤ 24                                         |
| Reflections collected                       | 183242                                                                          | 79116                                                                           | 22244                                                                           | 222774                                                                           | 226781                                                                           |
| Independent reflections                     | 6885 [R <sub>int</sub> = 0.1367, R <sub>sigma</sub> = 0.0338]                   | 3763 [R <sub>int</sub> = 0.1038, R <sub>sigma</sub> = 0.0290]                   | 4990 [R <sub>int</sub> = 0.0650, R <sub>sigma</sub> = 0.0475]                   | 6828 [R <sub>int</sub> = 0.1289, R <sub>sigma</sub> = 0.0268]                    | 8387 [R <sub>int</sub> = 0.1159, R <sub>sigma</sub> = 0.0259]                    |
| Data/restraints/parameters                  | 6885/1/489                                                                      | 3763/1/277                                                                      | 4990/0/279                                                                      | 6828/0/496                                                                       | 8387/0/524                                                                       |
| Goodness-of-fit on F <sup>2</sup>           | 1.079                                                                           | 1.072                                                                           | 1.064                                                                           | 1.059                                                                            | 1.027                                                                            |
| Final R indexes [I ≥ 2σ (I)]                | R <sub>1</sub> = 0.0608, wR <sub>2</sub> = 0.1627                               | R <sub>1</sub> = 0.0526, wR <sub>2</sub> = 0.1443                               | R <sub>1</sub> = 0.0585, wR <sub>2</sub> = 0.1520                               | R <sub>1</sub> = 0.0542, wR <sub>2</sub> = 0.1465                                | R <sub>1</sub> = 0.0524, wR <sub>2</sub> = 0.1407                                |
| Final R indexes [all data]                  | R <sub>1</sub> = 0.0717, wR <sub>2</sub> = 0.1752                               | R <sub>1</sub> = 0.0595, wR <sub>2</sub> = 0.1532                               | R <sub>1</sub> = 0.0692, wR <sub>2</sub> = 0.1613                               | R <sub>1</sub> = 0.0580, wR <sub>2</sub> = 0.1519                                | R <sub>1</sub> = 0.0561, wR <sub>2</sub> = 0.1450                                |
| Largest diff. peak/hole / e Å <sup>-3</sup> | 0.96/-0.66                                                                      | 0.39/-0.57                                                                      | 0.67/-0.53                                                                      | 0.80/-0.58                                                                       | 0.45/-0.83                                                                       |

|                                             | ZnDiclo6·EtOH                                                                    | ZnDiclo8                                                                         | MnDiclo6·MeOH                                                                   | MnDiclo6·EtOH                                                                   | MgDiclo6·MeOH                                                                   | MgDiclo6·EtOH                                                                   |
|---------------------------------------------|----------------------------------------------------------------------------------|----------------------------------------------------------------------------------|---------------------------------------------------------------------------------|---------------------------------------------------------------------------------|---------------------------------------------------------------------------------|---------------------------------------------------------------------------------|
| CCDC deposition number                      | 2237933                                                                          | 2237926                                                                          | 2237934                                                                         | 2237927                                                                         | 2237925                                                                         | 2237928                                                                         |
| Empirical formula                           | C <sub>42</sub> H <sub>44</sub> Cl <sub>4</sub> N <sub>6</sub> O <sub>5</sub> Zn | C <sub>42</sub> H <sub>42</sub> Cl <sub>4</sub> N <sub>6</sub> O <sub>4</sub> Zn | C <sub>42</sub> H <sub>46</sub> Cl <sub>4</sub> MnN <sub>6</sub> O <sub>6</sub> | C <sub>44</sub> H <sub>50</sub> Cl <sub>4</sub> MnN <sub>6</sub> O <sub>6</sub> | C <sub>42</sub> H <sub>46</sub> Cl <sub>4</sub> MgN <sub>6</sub> O <sub>6</sub> | C <sub>44</sub> H <sub>50</sub> Cl <sub>4</sub> MgN <sub>6</sub> O <sub>6</sub> |
| Formula weight                              | 920.00                                                                           | 901.98                                                                           | 927.59                                                                          | 955.64                                                                          | 896.96                                                                          | 925.01                                                                          |
| Crystal system                              | monoclinic                                                                       | triclinic                                                                        | monoclinic                                                                      | monoclinic                                                                      | monoclinic                                                                      | monoclinic                                                                      |
| Space group                                 | P2 <sub>1</sub> /n                                                               | P-1                                                                              | P2 <sub>1</sub> /n                                                              | P2 <sub>1</sub> /n                                                              | P2 <sub>1</sub> /n                                                              | P2 <sub>1</sub> /n                                                              |
| a/Å                                         | 14.82310(10)                                                                     | 11.3205(4)                                                                       | 8.5133(2)                                                                       | 8.5583(9)                                                                       | 8.48440(10)                                                                     | 8.50360(10)                                                                     |
| b/Å                                         | 14.77870(10)                                                                     | 13.1000(5)                                                                       | 20.8959(7)                                                                      | 21.737(3)                                                                       | 20.9466(2)                                                                      | 21.7792(3)                                                                      |
| c/Å                                         | 19.9676(2)                                                                       | 15.6723(6)                                                                       | 12.8879(4)                                                                      | 12.8769(19)                                                                     | 12.84190(10)                                                                    | 12.8123(2)                                                                      |
| α/°                                         | 90                                                                               | 113.7270(10)                                                                     | 90                                                                              | 90                                                                              | 90                                                                              | 90                                                                              |
| β/°                                         | 96.8790(10)                                                                      | 98.6240(10)                                                                      | 107.4090(10)                                                                    | 108.475(14)                                                                     | 107.4270(10)                                                                    | 108.489(2)                                                                      |
| γ/°                                         | 90                                                                               | 97.2980(10)                                                                      | 90                                                                              | 90                                                                              | 90                                                                              | 90                                                                              |
| Volume/Å <sup>3</sup>                       | 4342.74(6)                                                                       | 2058.10(13)                                                                      | 2187.65(11)                                                                     | 2272.1(5)                                                                       | 2177.50(4)                                                                      | 2250.38(6)                                                                      |
| Z                                           | 4                                                                                | 2                                                                                | 2                                                                               | 2                                                                               | 2                                                                               | 2                                                                               |
| ρ <sub>calc</sub> /g/cm <sup>3</sup>        | 1.407                                                                            | 1.455                                                                            | 1.408                                                                           | 1.397                                                                           | 1.368                                                                           | 1.365                                                                           |
| μ/mm <sup>-1</sup>                          | 3.464                                                                            | 3.625                                                                            | 0.599                                                                           | 4.965                                                                           | 3.053                                                                           | 2.970                                                                           |
| F(000)                                      | 1904.0                                                                           | 932.0                                                                            | 962.0                                                                           | 994.0                                                                           | 936.0                                                                           | 968.0                                                                           |
| Crystal size/mm <sup>3</sup>                | 0.3 × 0.15 × 0.15                                                                | 0.2 × 0.2 × 0.1                                                                  | 0.3 × 0.3 × 0.1                                                                 | 0.2 × 0.05 × 0.05                                                               | 0.4 × 0.3 × 0.2                                                                 | 0.2 × 0.2 × 0.1                                                                 |
| 2θ range for data collection/°              | 7.038 to 148.994                                                                 | 6.316 to 144.194                                                                 | 6.354 to 56.712                                                                 | 8.134 to 133.176                                                                | 8.36 to 158.52                                                                  | 8.12 to 136.464                                                                 |
| Index ranges                                | -17 ≤ h ≤ 18, -18 ≤ k ≤ 18, -24 ≤ l ≤ 24                                         | -13 ≤ h ≤ 13, -16 ≤ k ≤ 16, -19 ≤ l ≤ 19                                         | -11 ≤ h ≤ 11, -27 ≤ k ≤ 27, -17 ≤ l ≤ 17                                        | -9 ≤ h ≤ 10, -25 ≤ k ≤ 25, -15 ≤ l ≤ 14                                         | -10 ≤ h ≤ 9, -26 ≤ k ≤ 26, -16 ≤ l ≤ 16                                         | -9 ≤ h ≤ 10, -26 ≤ k ≤ 26, -15 ≤ l ≤ 15                                         |
| Reflections collected                       | 93894                                                                            | 46068                                                                            | 137306                                                                          | 24612                                                                           | 40598                                                                           | 45917                                                                           |
| Independent reflections                     | 8888 [R <sub>int</sub> = 0.0652, R <sub>sigma</sub> = 0.0252]                    | 8063 [R <sub>int</sub> = 0.0361, R <sub>sigma</sub> = 0.0222]                    | 5427 [R <sub>int</sub> = 0.0417, R <sub>sigma</sub> = 0.0120]                   | 4000 [R <sub>int</sub> = 0.1870, R <sub>sigma</sub> = 0.1128]                   | 4696 [R <sub>int</sub> = 0.0473, R <sub>sigma</sub> = 0.0241]                   | 4132 [R <sub>int</sub> = 0.0675, R <sub>sigma</sub> = 0.0293]                   |
| Data/restraints/parameters                  | 8888/113/573                                                                     | 8063/48/522                                                                      | 5427/3/276                                                                      | 4000/3/285                                                                      | 4696/3/272                                                                      | 4132/9/285                                                                      |
| Goodness-of-fit on F <sup>2</sup>           | 1.043                                                                            | 1.051                                                                            | 1.075                                                                           | 0.967                                                                           | 1.072                                                                           | 1.048                                                                           |
| Final R indexes [I>=2σ (I)]                 | R <sub>1</sub> = 0.0486, wR <sub>2</sub> = 0.1357                                | R <sub>1</sub> = 0.0361, wR <sub>2</sub> = 0.0943                                | R <sub>1</sub> = 0.0311, wR <sub>2</sub> = 0.0802                               | R <sub>1</sub> = 0.0754, wR <sub>2</sub> = 0.1829                               | R <sub>1</sub> = 0.0431, wR <sub>2</sub> = 0.1135                               | R <sub>1</sub> = 0.0346, wR <sub>2</sub> = 0.0893                               |
| Final R indexes [all data]                  | R <sub>1</sub> = 0.0566, wR <sub>2</sub> = 0.1454                                | R <sub>1</sub> = 0.0391, wR <sub>2</sub> = 0.0968                                | R <sub>1</sub> = 0.0369, wR <sub>2</sub> = 0.0852                               | R <sub>1</sub> = 0.1362, wR <sub>2</sub> = 0.2346                               | R <sub>1</sub> = 0.0463, wR <sub>2</sub> = 0.1169                               | R <sub>1</sub> = 0.0421, wR <sub>2</sub> = 0.0942                               |
| Largest diff. peak/hole / e Å <sup>-3</sup> | 0.33/-0.45                                                                       | 0.75/-0.74                                                                       | 0.39/-0.33                                                                      | 0.81/-0.69                                                                      | 0.35/-0.59                                                                      | 0.22/-0.29                                                                      |

### 1.3 Packing Diagrams

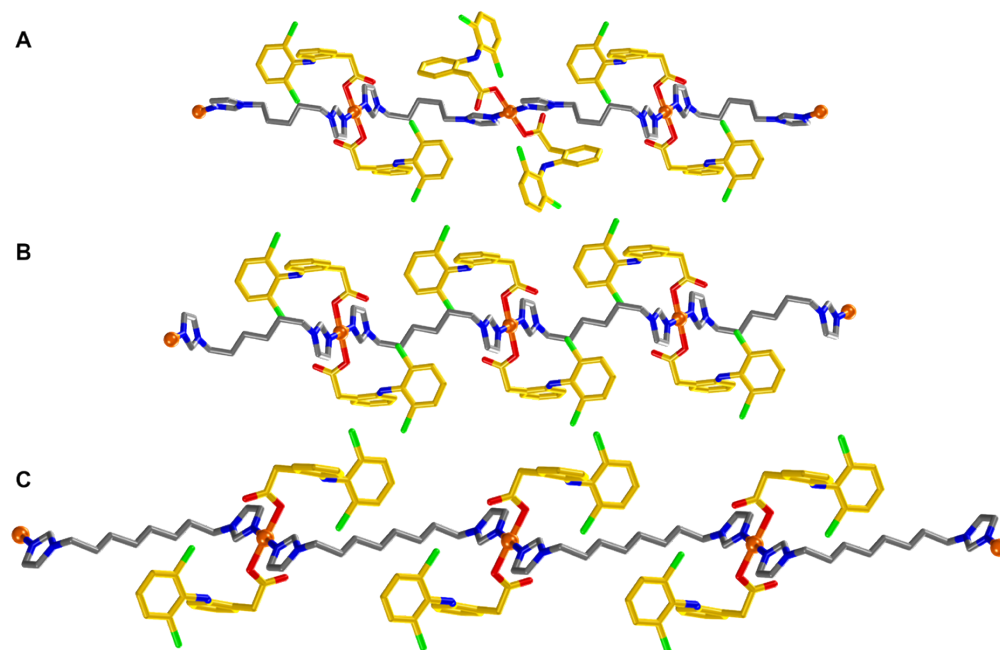

Figure S12. Single crystal structures of TCPs, a)  $\text{Cu}(\text{Diclo})_2(\text{biim-5})$ , b)  $\text{Cu}(\text{Diclo})_2(\text{biim-6}) \cdot (\text{MeOH})_2$ ,  $\text{Cu}(\text{Diclo})_2(\text{biim-8}) \cdot (\text{MeOH})_2$ . Cu = orange, N = blue, O = red, Cl = green, bis-imidazole and Diclofenac C-atoms are shown in silver and gold, respectively. H atoms and solvent omitted for clarity.



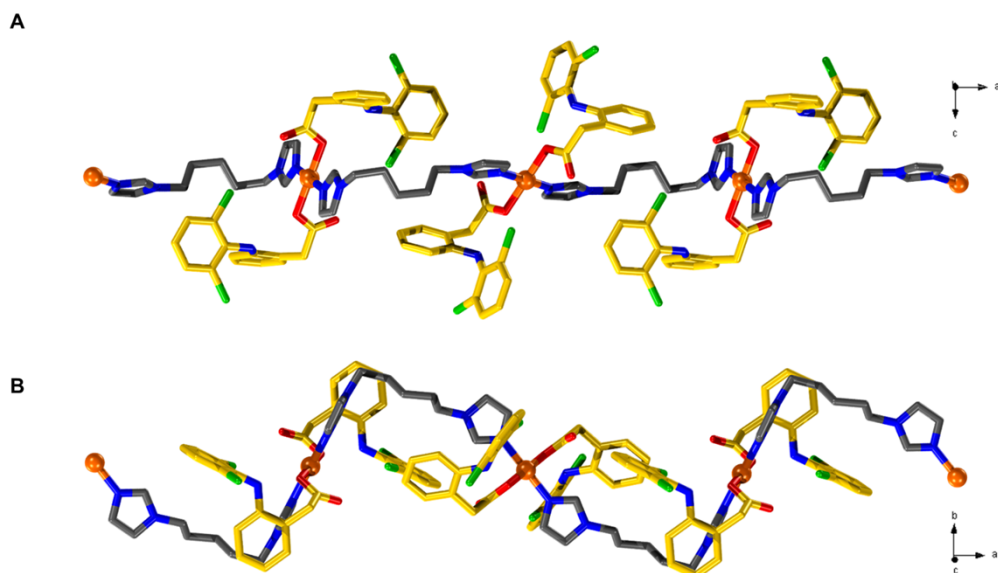

Figure S13. One-dimensional chain of  $\text{Cu}(\text{Diclo})_2(\text{biim-5})$  as viewed a) along the b-axis, and b) along the c-axis. Cu = orange, N = blue, O = red, Cl = green, bis-imidazole and Diclofenac C-atoms are shown in silver and gold, respectively. H atoms omitted for clarity.

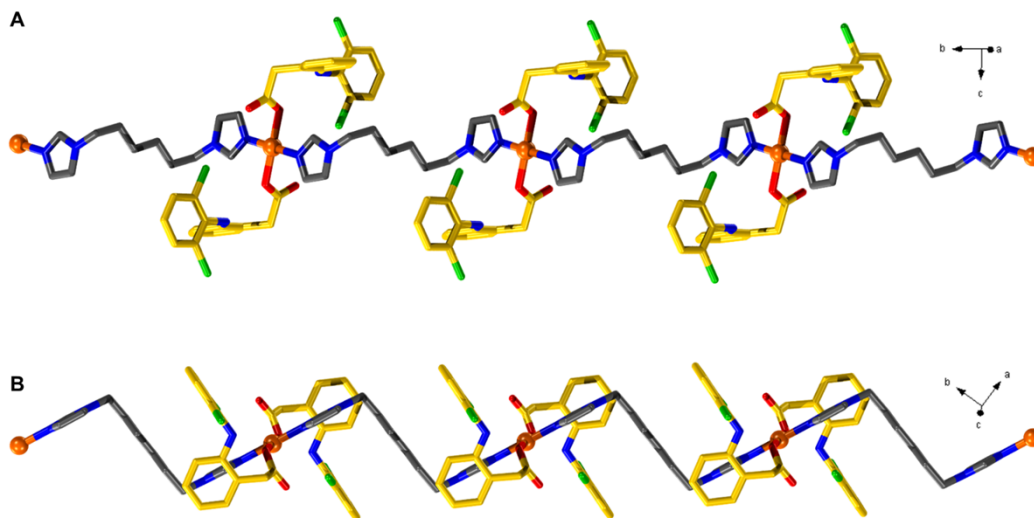

Figure S14. One-dimensional chain of  $\text{Cu}(\text{Diclo})_2(\text{biim-6}) \cdot (\text{MeOH})_2$  as viewed a) along the a-axis, and b) along the c-axis. Cu = orange, N = blue, O = red, Cl = green, bis-imidazole and Diclofenac C-atoms are shown in silver and gold, respectively. H atoms and solvent omitted for clarity.

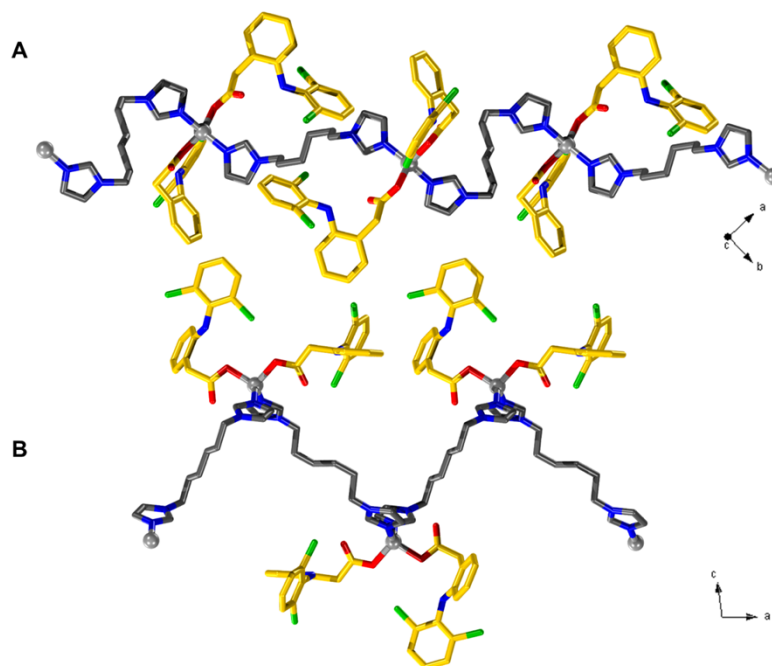

Figure S15. One-dimensional chain of  $\text{Zn}(\text{Diclo})_2(\text{biim-6}) \cdot (\text{MeOH})$  as viewed a) along the c-axis, and b) along the b-axis. Zn = grey, N = blue, O = red, Cl = green, bis-imidazole and Diclofenac C-atoms are shown in silver and gold, respectively. H atoms and solvent omitted for clarity.

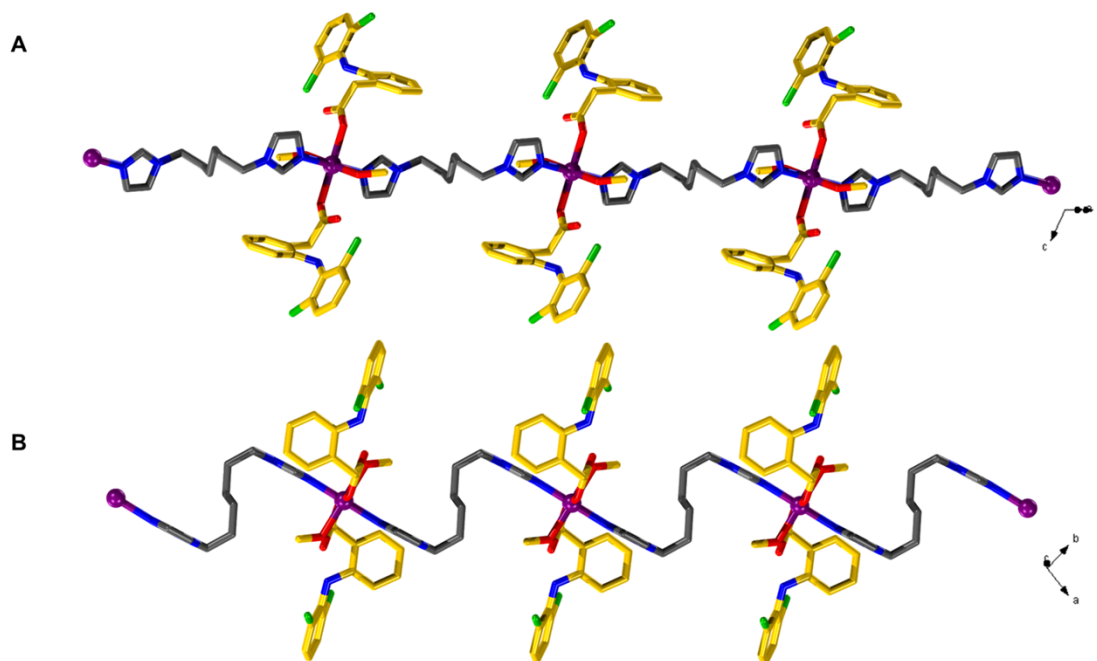

Figure S16. One-dimensional chain of  $\text{Mn}(\text{Diclo})_2(\text{biim-6})(\text{MeOH})_2$  as viewed a) along the a-axis, and b) along the c-axis. Mn = purple, N = blue, O = red, Cl = green, bis-imidazole and Diclofenac C-atoms are shown in silver and gold, respectively. H atoms omitted for clarity.

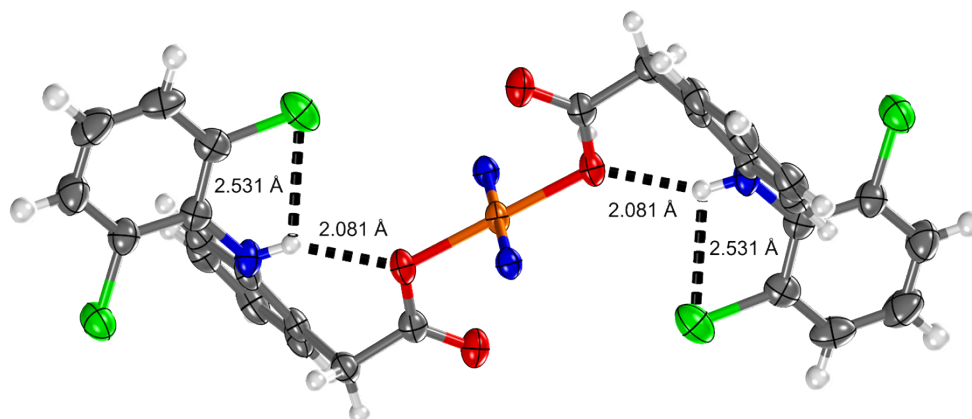

Figure S17. Coordination environment in  $\text{Cu}(\text{Diclo})_2(\text{biim-8})(\text{MeOH})_2$  showing intramolecular H-bonding interactions of Diclofenac.

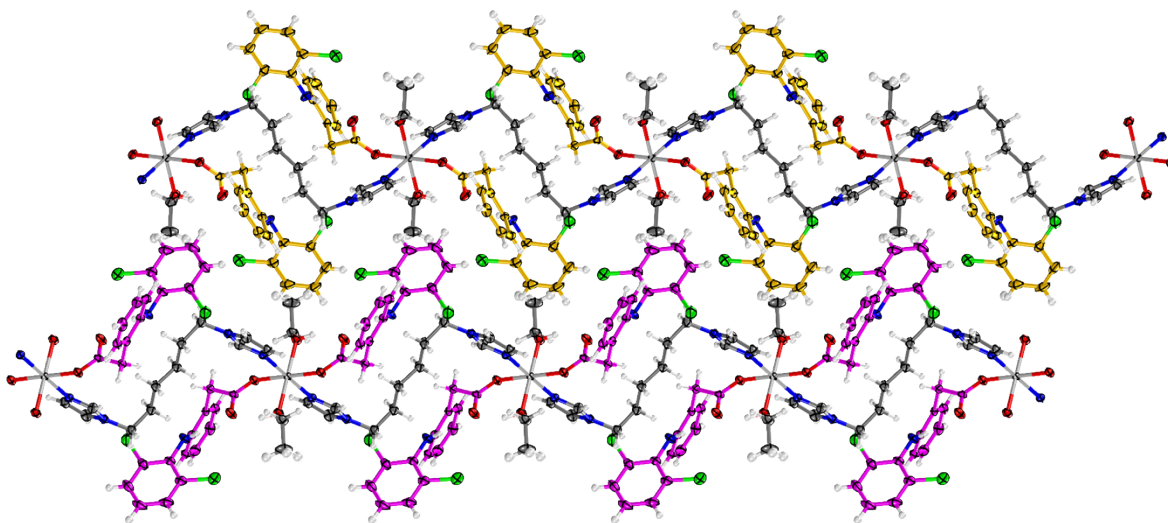

Figure S18. Packing of parallel polymeric chains in  $\text{Mg}(\text{Diclo})_2(\text{biim-6})(\text{EtOH})_2$  as seen along the *a*-axis. Diclofenac C atoms colored pink in one strand and yellow in the other to depict close packing of the chains. Mg = light grey, N = blue, O = red, Cl = green, C (bis-imidazole linker) = grey.

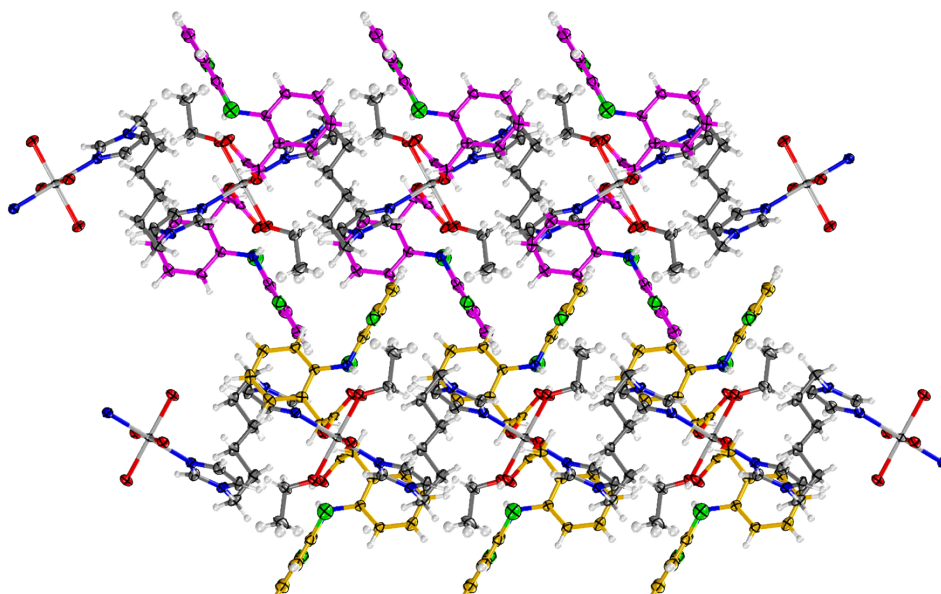

Figure S19. Packing of parallel polymeric chains in  $\text{Mg}(\text{Diclo})_2(\text{biim-6})(\text{EtOH})_2$  as seen along the *c*-axis. Diclofenac C atoms colored pink in one strand and yellow in the other to depict close packing of the chains. Mg = light grey, N = blue, O = red, Cl = green, C (bis-imidazole linker) = grey.

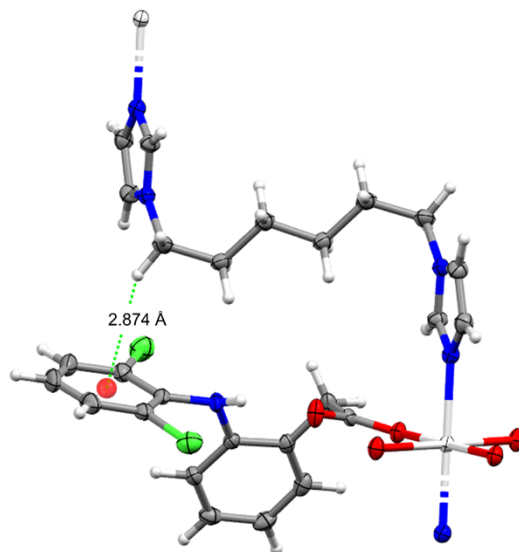

Figure S20. C-H $\cdots\pi$  interaction between Diclofenac centroid (C9-C14) and H atom of bis-imidazole linker in  $\text{Mg}(\text{Diclo})_2(\text{biim-6})(\text{EtOH})_2$ . Mg = light grey, N = blue, O = red, Cl = green, C = grey.

## 2. Infrared Spectroscopy

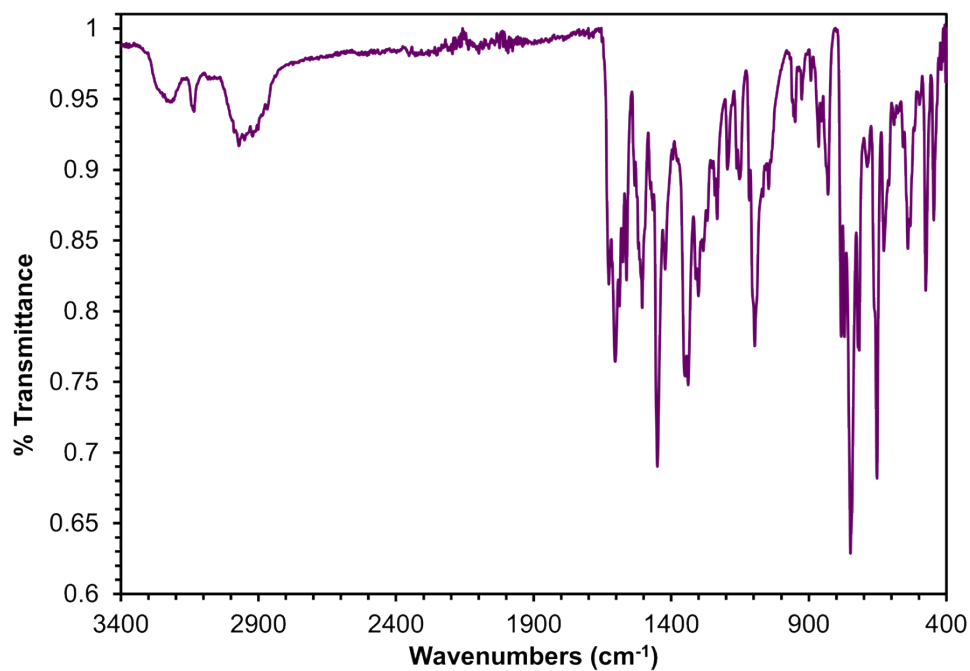

Figure S21: Infrared spectrum of  $\text{Cu}(\text{Diclo})_2(\text{biim-5})$ .

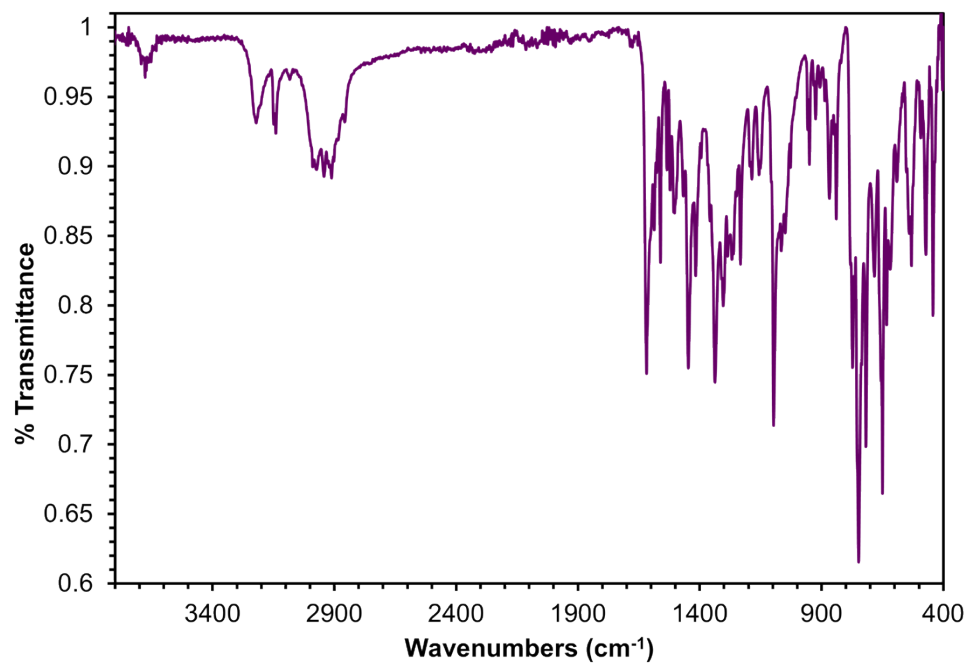

Figure S22: Infrared spectrum of Cu(Diclo)<sub>2</sub>(biim-6)·(MeOH)<sub>2</sub>.

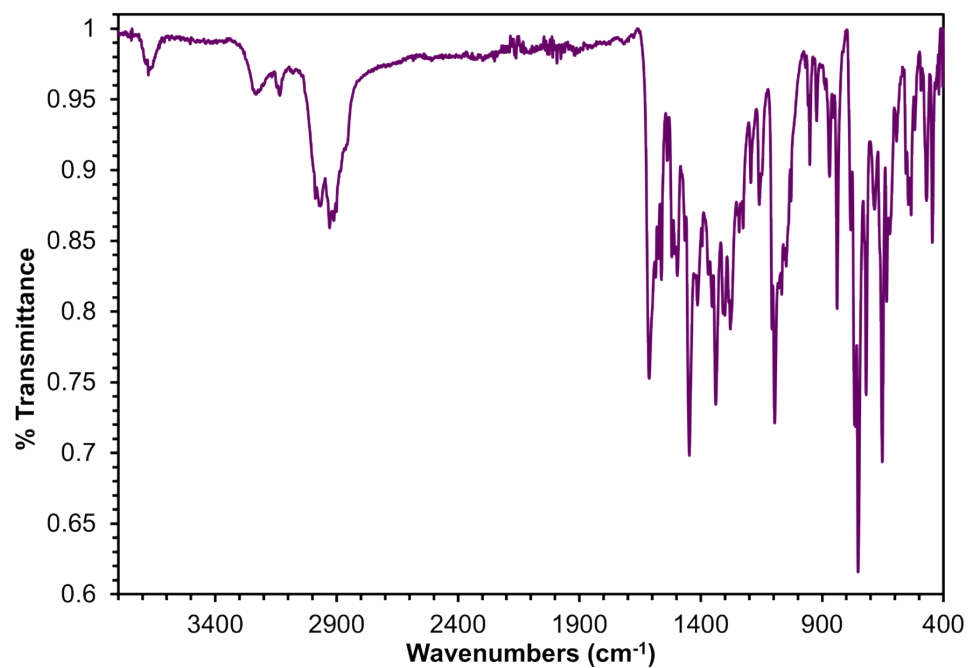

Figure S23: Infrared spectrum of Cu(Diclo)<sub>2</sub>(biim-8)·(MeOH)<sub>2</sub>.

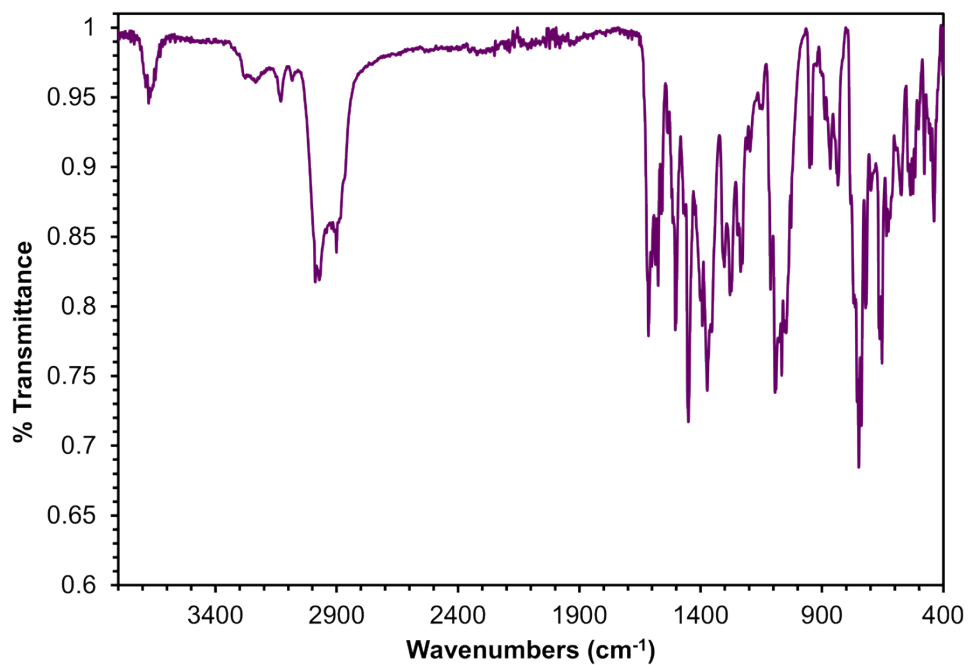

Figure S24: Infrared spectrum of Zn(Diclo)<sub>2</sub>(biim-5).

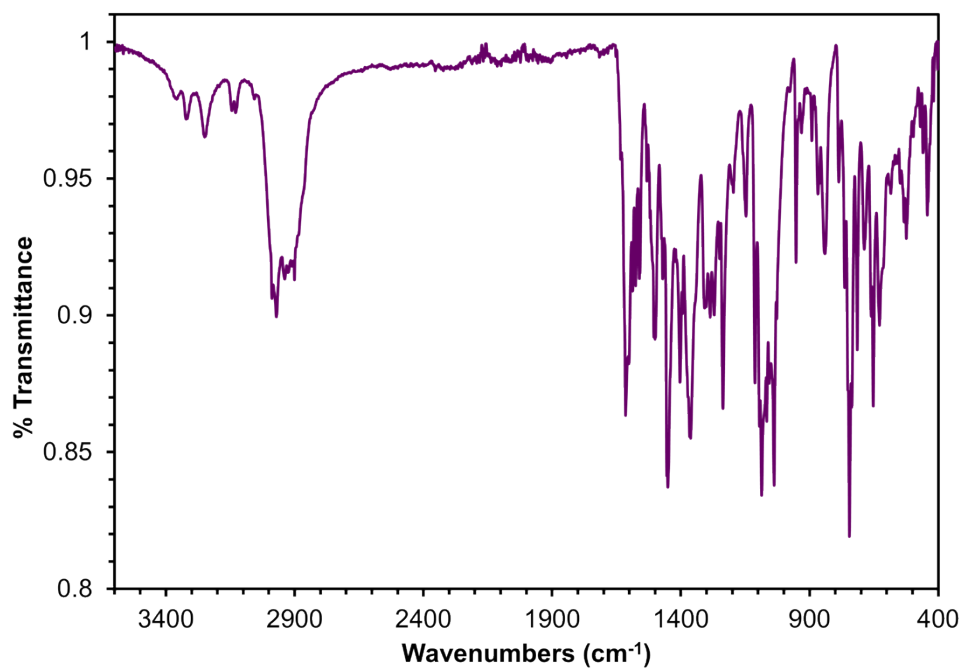

Figure S25: Infrared spectrum of Zn(Diclo)<sub>2</sub>(biim-6)·(MeOH).

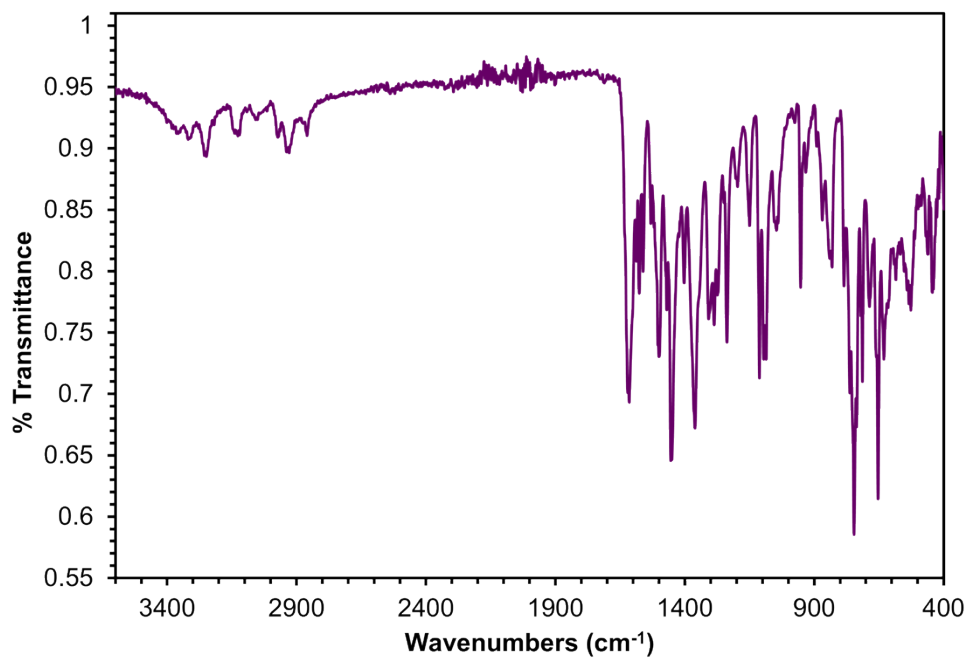

Figure S26: Infrared spectrum of Zn(Diclo)<sub>2</sub>(biim-6)·(EtOH).

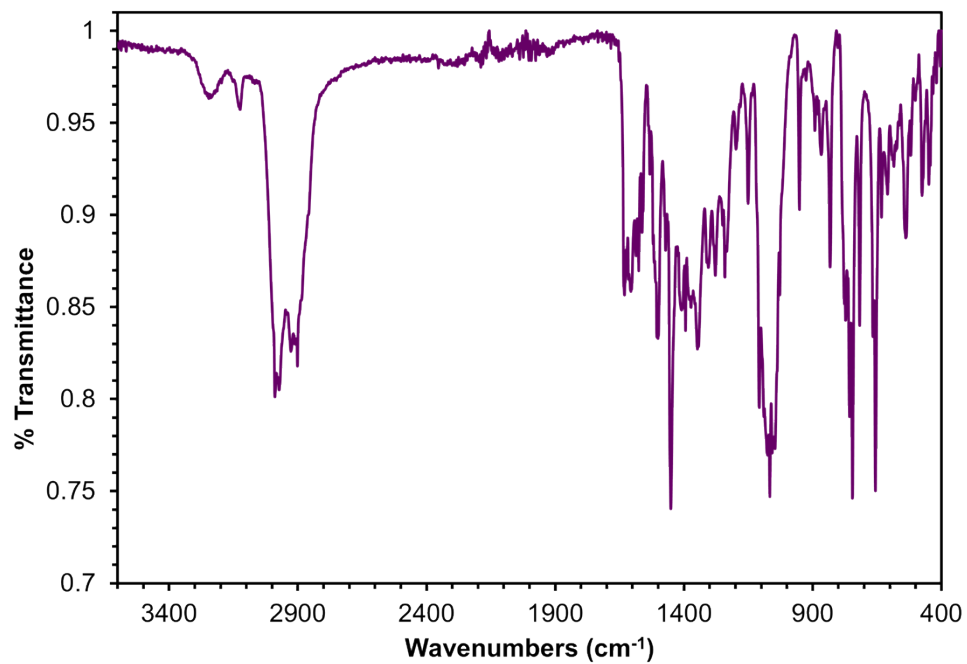

Figure S27: Infrared spectrum of Zn(Diclo)<sub>2</sub>(biim-8).



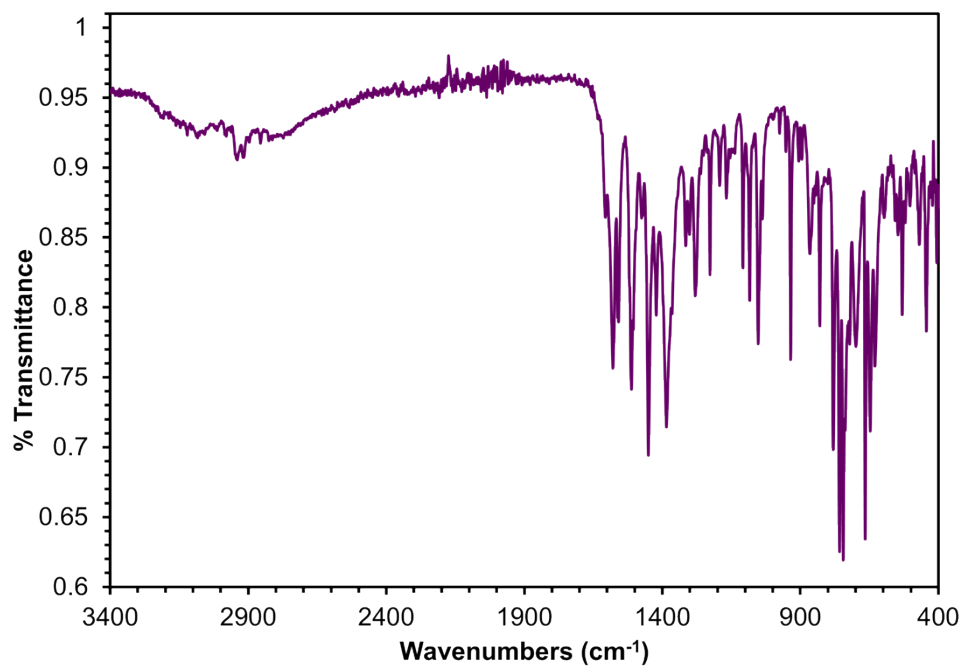

Figure S28: Infrared spectrum of Mg(Diclo)<sub>2</sub>(biim-6)(MeOH)<sub>2</sub>.

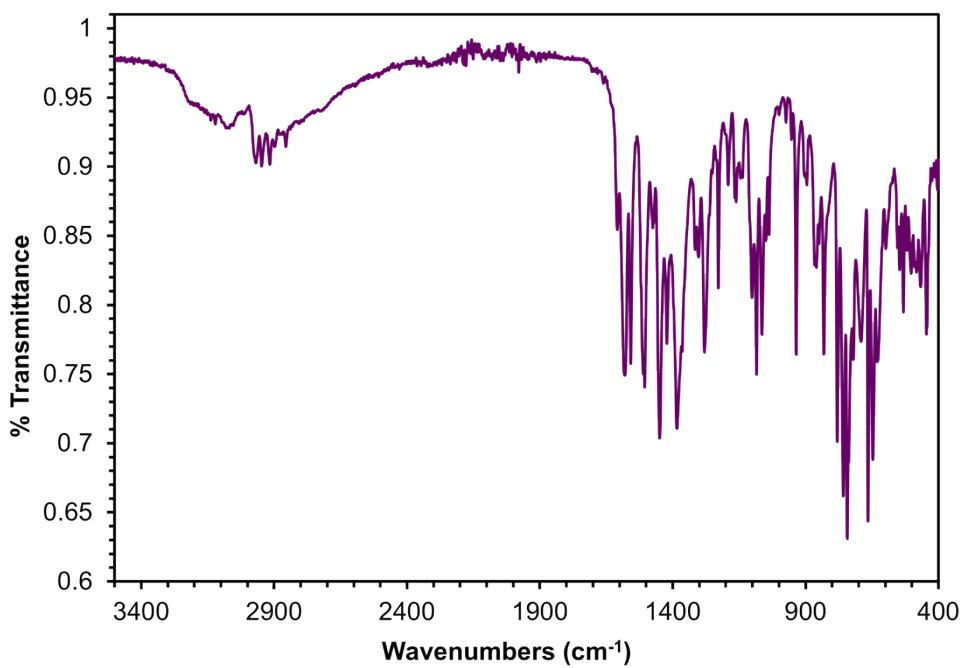

Figure S29: Infrared spectrum of Mg(Diclo)<sub>2</sub>(biim-6)(EtOH)<sub>2</sub>.

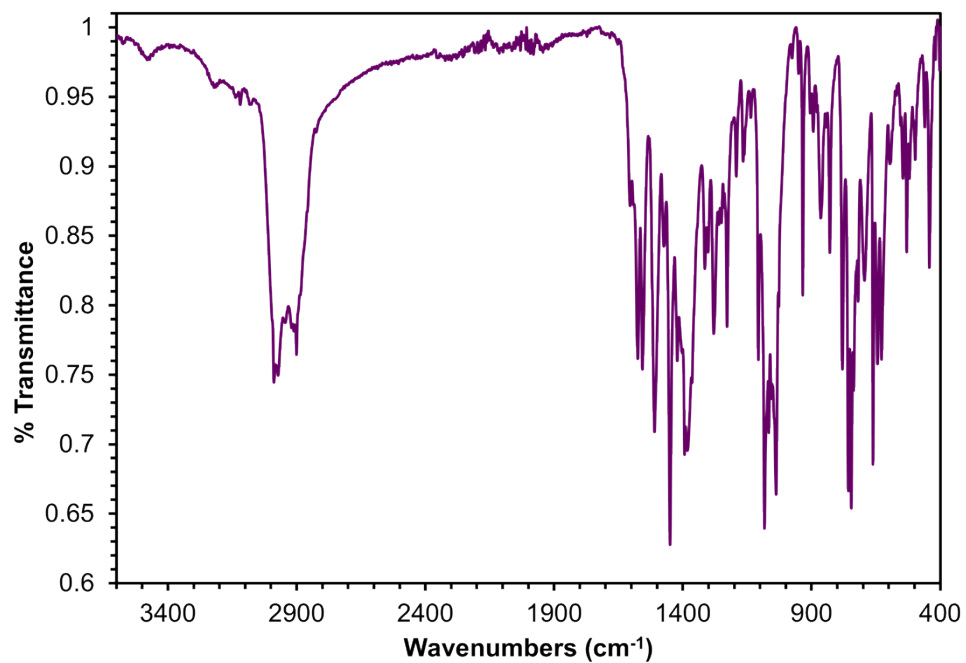

Figure S30: Infrared spectrum of Mn(Diclo)<sub>2</sub>(biim-6)(MeOH)<sub>2</sub>.

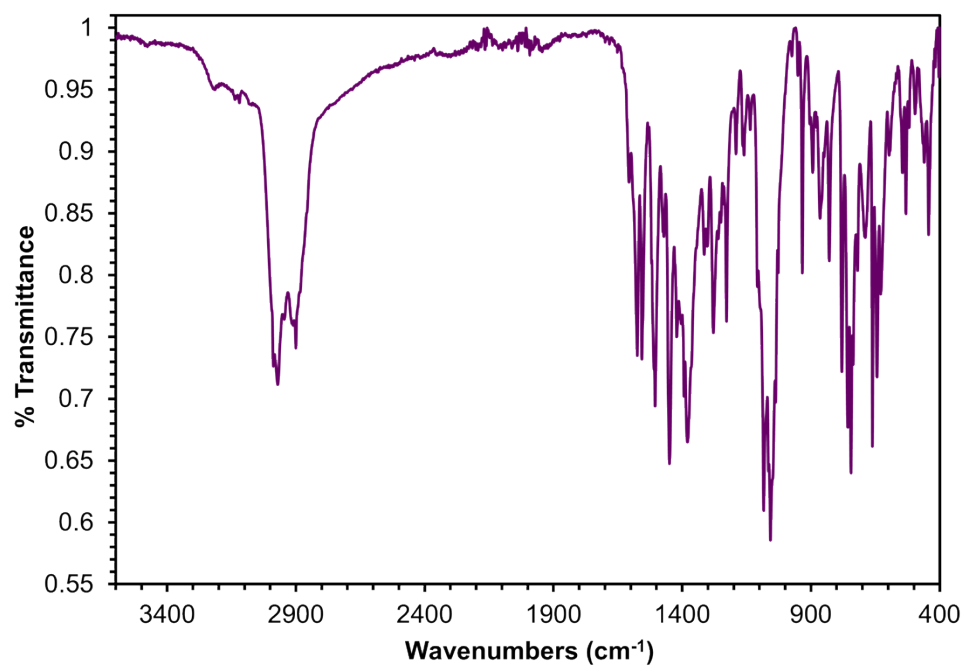

Figure S31: Infrared spectrum of Mn(Diclo)<sub>2</sub>(biim-6)(EtOH)<sub>2</sub>.

### 3. Powder X-Ray Diffraction

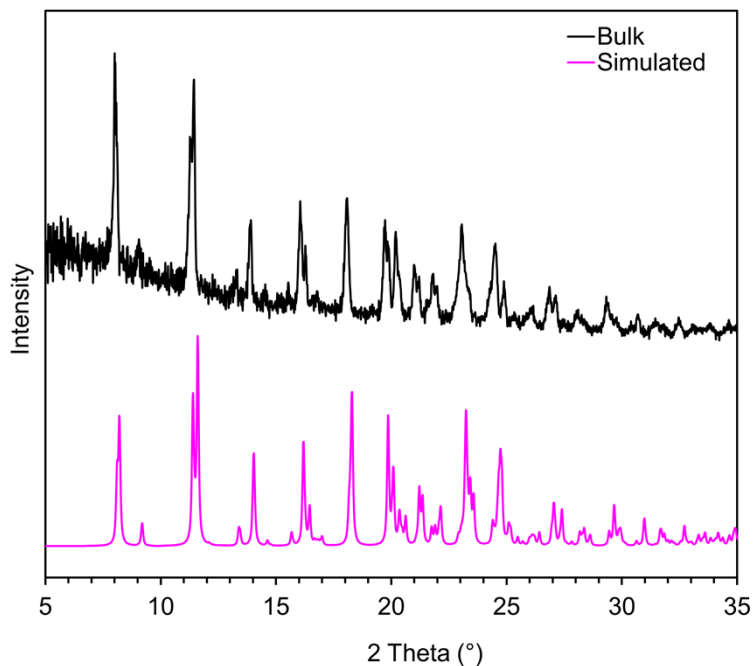

Figure S32: Comparison of Powder XRD pattern ( $\text{CuK}\alpha$  radiation,  $\lambda = 1.5418 \text{ \AA}$ ) from single crystal (simulated) and the bulk powder sample of  $\text{Cu}(\text{Diclo})_2(\text{biim-5})$ .

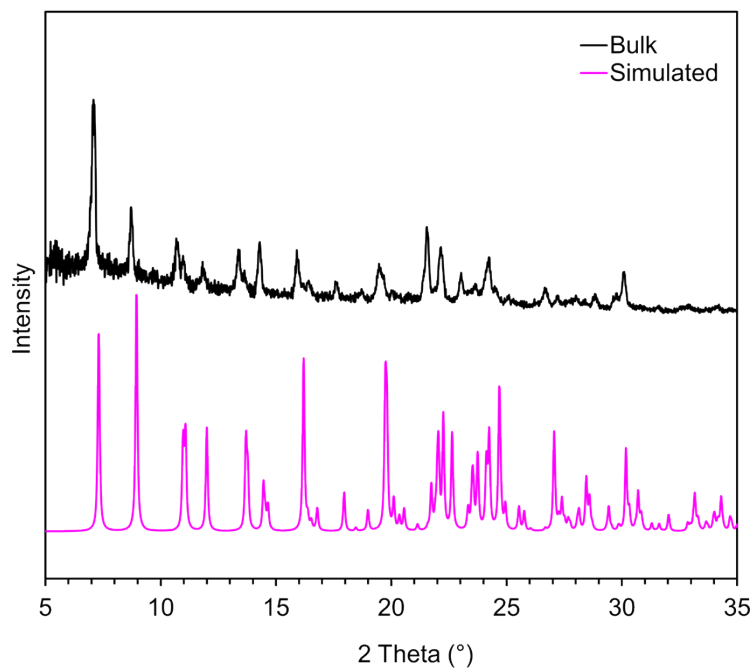

Figure S33: Comparison of Powder XRD pattern ( $\text{CuK}\alpha$  radiation,  $\lambda = 1.5418 \text{ \AA}$ ) from single crystal (simulated) and the bulk powder sample of  $\text{Cu}(\text{Diclo})_2(\text{biim-6}) \cdot (\text{MeOH})_2$ .

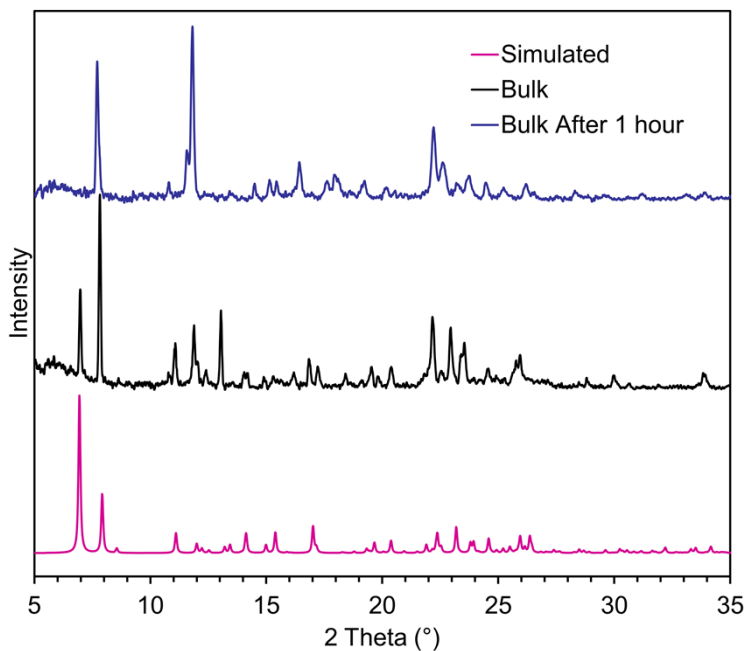

Figure S34. Comparison of Powder XRD pattern ( $\text{CuK}\alpha$  radiation,  $\lambda = 1.5418 \text{ \AA}$ ) from single crystal (simulated) and the bulk powder sample of  $\text{Cu}(\text{Diclo})_2(\text{biim-8}) \cdot (\text{MeOH})_2$ . After 1 hour, the bulk powder phase desolvated and a new phase formed.

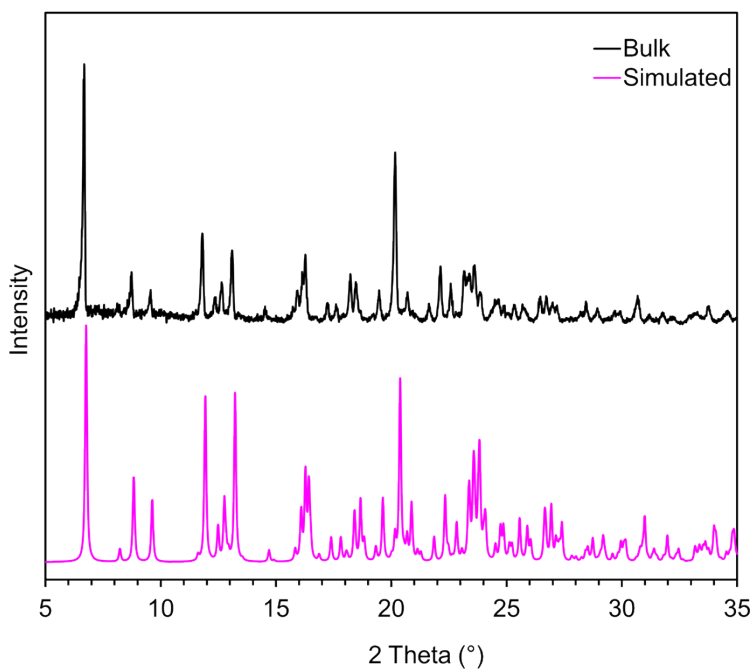

Figure S35: Comparison of Powder XRD pattern ( $\text{CuK}\alpha$  radiation,  $\lambda = 1.5418 \text{ \AA}$ ) from single crystal (simulated) and the bulk powder sample of  $\text{Zn}(\text{Diclo})_2(\text{biim-5})$ .

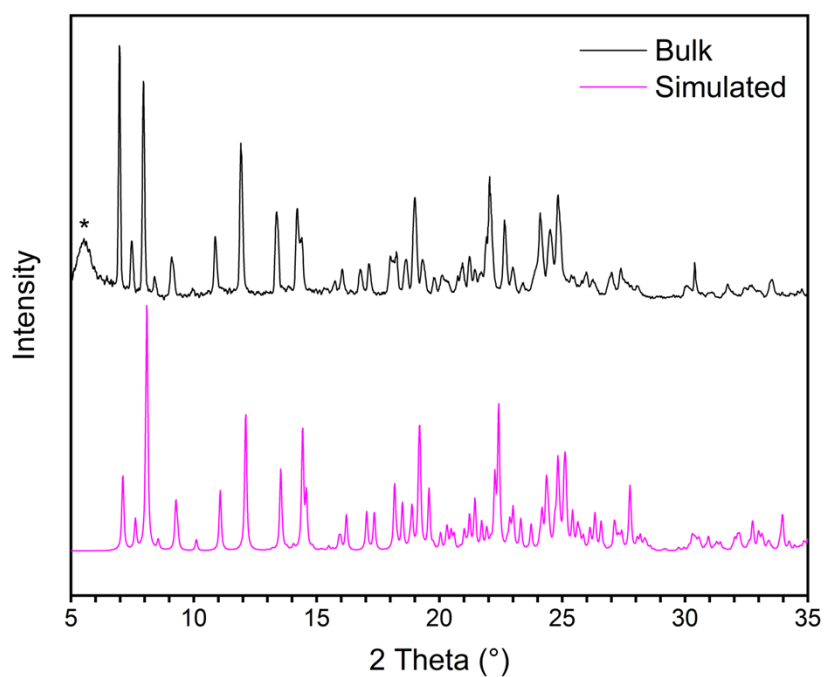

Figure S36: Comparison of Powder XRD pattern (CuK $\alpha$  radiation,  $\lambda = 1.5418 \text{ \AA}$ ) from single crystal (simulated) and the bulk powder sample of Zn(Diclo)<sub>2</sub>(biim-6)·(MeOH) (\*Kapton film).

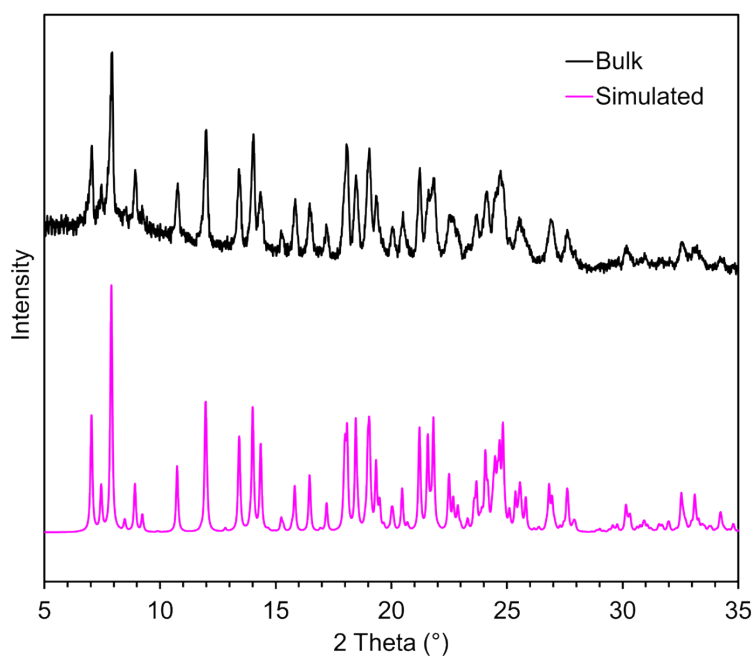

Figure S37: Comparison of Powder XRD pattern (CuK $\alpha$  radiation,  $\lambda = 1.5418 \text{ \AA}$ ) from single crystal (simulated) and the bulk powder sample of Zn(Diclo)<sub>2</sub>(biim-6)·(EtOH).

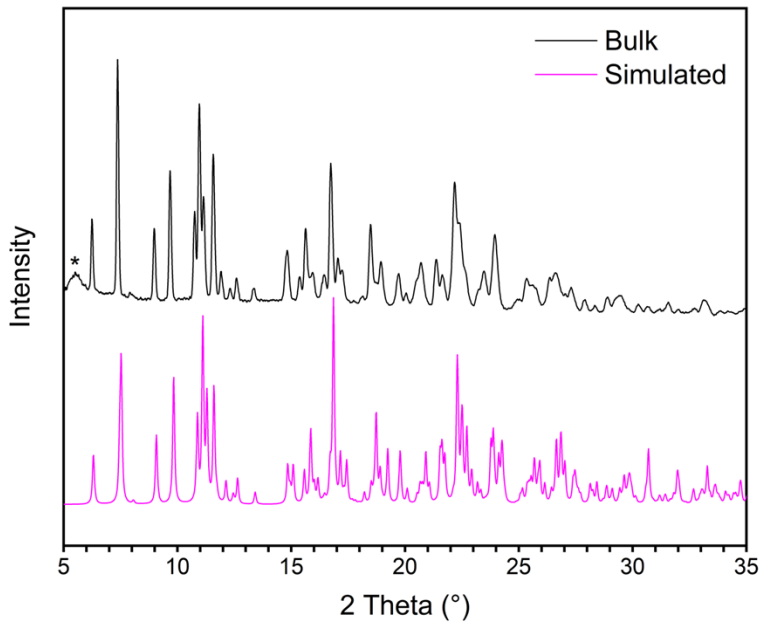

Figure S38: Comparison of Powder XRD pattern (CuK $\alpha$  radiation,  $\lambda = 1.5418 \text{ \AA}$ ) from single crystal (simulated) and the bulk powder sample of Zn(Diclo)<sub>2</sub>(biim-8) (\*Kapton film).

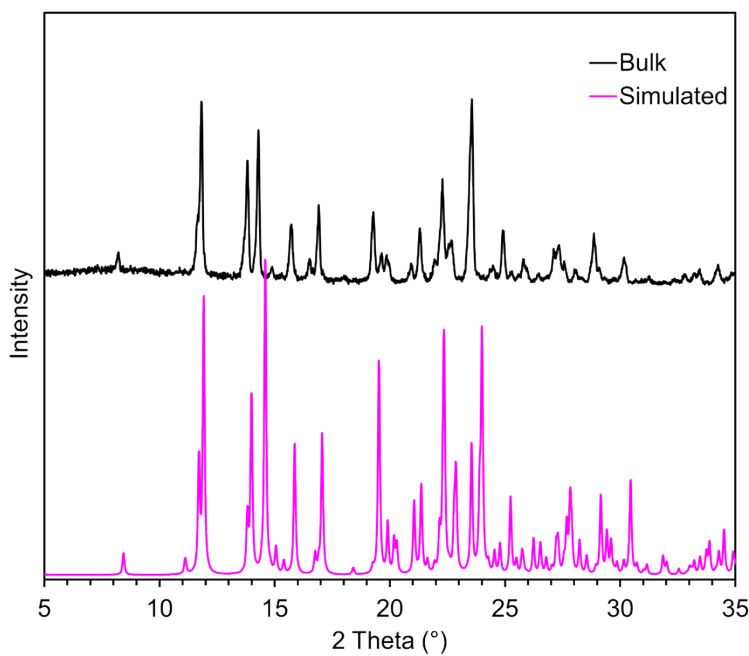

Figure S39: Comparison of Powder XRD pattern (CuK $\alpha$  radiation,  $\lambda = 1.5418 \text{ \AA}$ ) from single crystal (simulated) and the bulk powder sample of Mg(Diclo)<sub>2</sub>(biim-6)(MeOH)<sub>2</sub>.

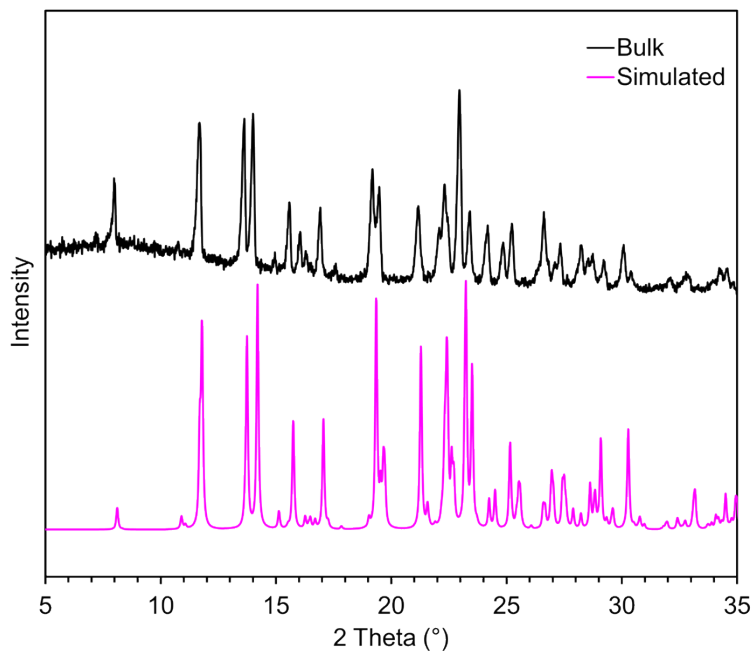

Figure S40: Comparison of Powder XRD pattern (CuK $\alpha$  radiation,  $\lambda = 1.5418 \text{ \AA}$ ) from single crystal (simulated) and the bulk powder sample of  $\text{Mg}(\text{Diclo})_2(\text{biim-6})(\text{EtOH})_2$ .

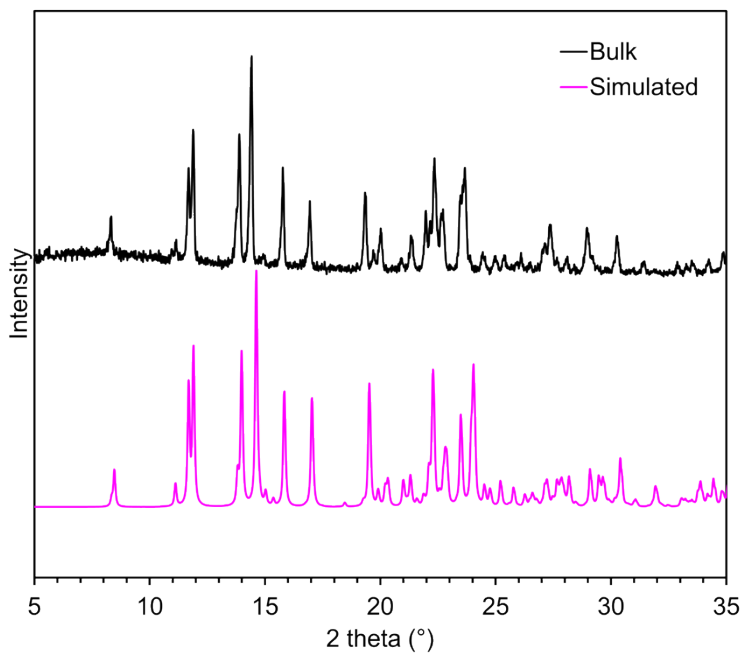

Figure S41: Comparison of Powder XRD pattern (CuK $\alpha$  radiation,  $\lambda = 1.5418 \text{ \AA}$ ) from single crystal (simulated) and the bulk powder sample of  $\text{Mn}(\text{Diclo})_2(\text{biim-6})(\text{MeOH})_2$ .

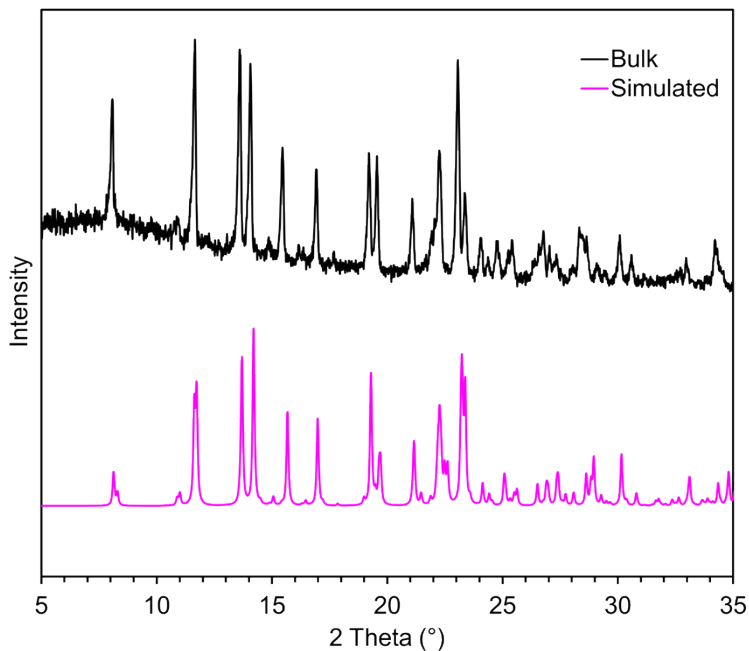

Figure S42: Comparison of Powder XRD pattern ( $\text{CuK}\alpha$  radiation,  $\lambda = 1.5418 \text{ \AA}$ ) from single crystal (simulated) and the bulk powder sample of  $\text{Mn(Diclo)}_2(\text{biim-6})(\text{EtOH})_2$ .

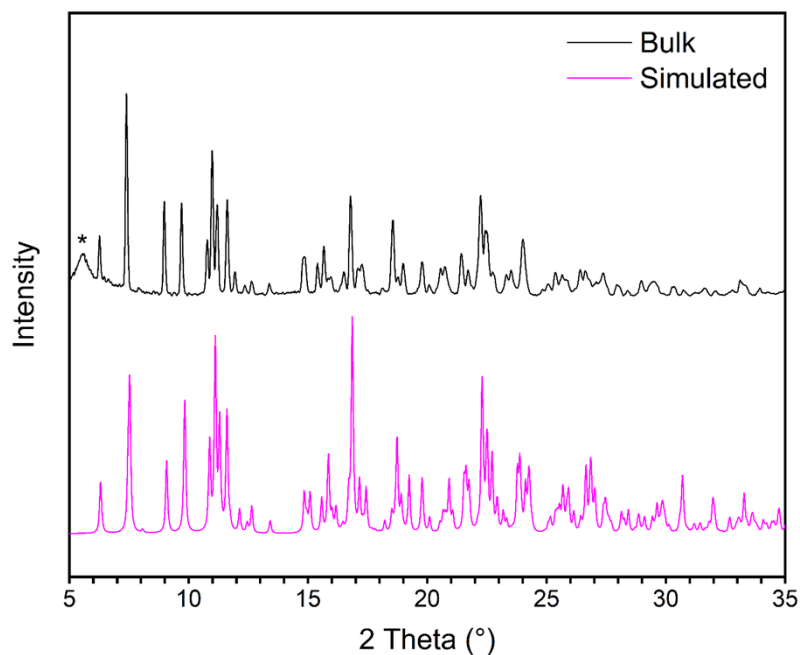

Figure S43: Comparison of Powder XRD pattern ( $\text{CuK}\alpha$  radiation,  $\lambda = 1.5418 \text{ \AA}$ ) from single crystal (simulated) and the bulk powder sample of  $\text{Zn(Diclo)}_2(\text{biim-8})$  taken after 1 year.



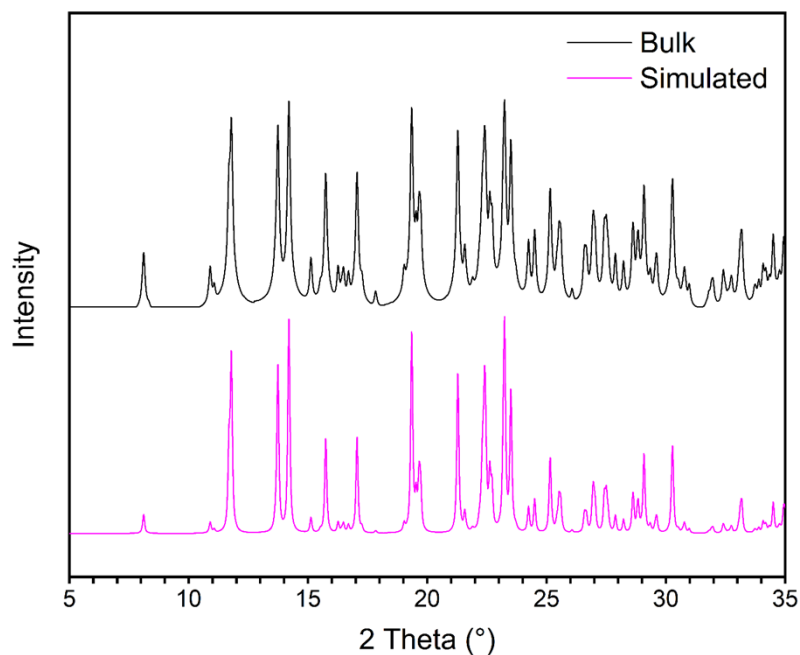

Figure S44: Comparison of Powder XRD pattern (CuK $\alpha$  radiation,  $\lambda = 1.5418 \text{ \AA}$ ) from single crystal (simulated) and the bulk powder sample of  $\text{Mg}(\text{Diclo})_2(\text{biim-6})(\text{EtOH})_2$  taken after 1 year.

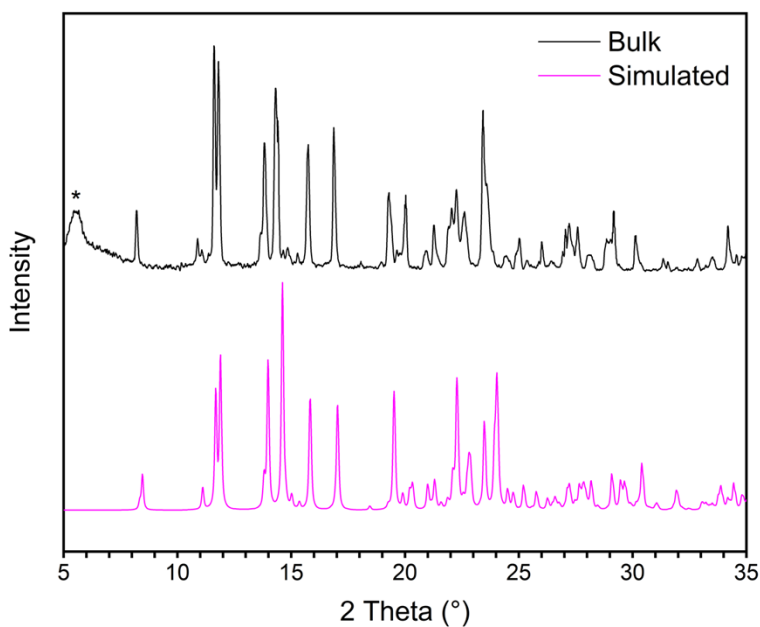

Figure S45: Comparison of Powder XRD pattern (CuK $\alpha$  radiation,  $\lambda = 1.5418 \text{ \AA}$ ) from single crystal (simulated) and the bulk powder sample of  $\text{Mn}(\text{Diclo})_2(\text{biim-6})(\text{MeOH})_2$  taken after 1 year (\*Kapton film).

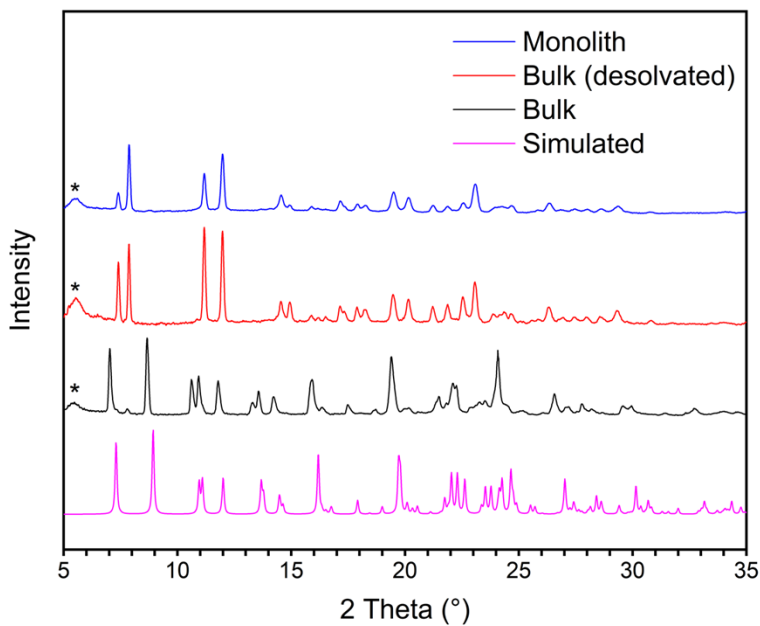

Figure S46: Comparison of Powder XRD pattern (CuK $\alpha$  radiation,  $\lambda = 1.5418 \text{ \AA}$ ) from single crystal (simulated), the bulk powder sample of  $\text{Cu}(\text{Diclo})_2(\text{biim-6}) \cdot (\text{MeOH})_2$ , the bulk powder sample desolvated ( $\text{Cu}(\text{Diclo})_2(\text{biim-6})'$ ), and the monolith (\*Kapton film).

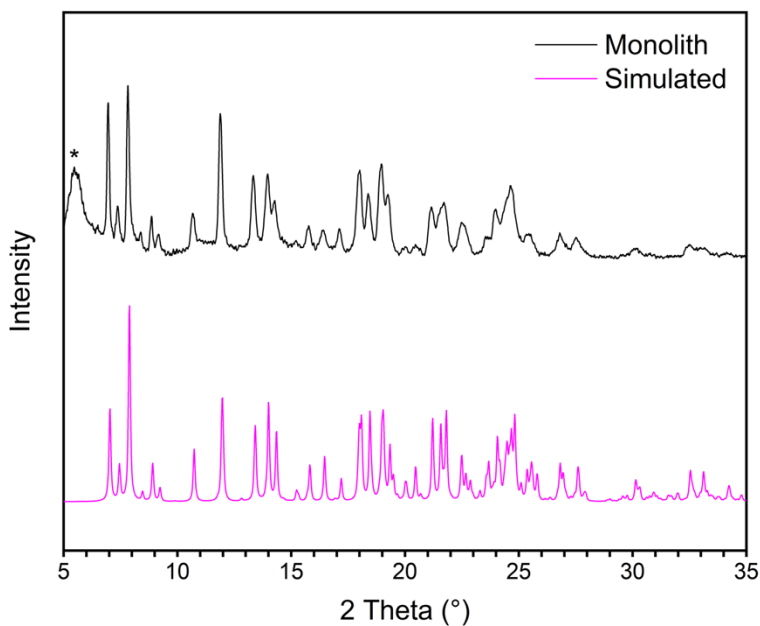

Figure S47: Comparison of Powder XRD pattern (CuK $\alpha$  radiation,  $\lambda = 1.5418 \text{ \AA}$ ) from single crystal (simulated) and the monolith of  $\text{Zn}(\text{Diclo})_2(\text{biim-6}) \cdot (\text{EtOH})$  (\*Kapton film).

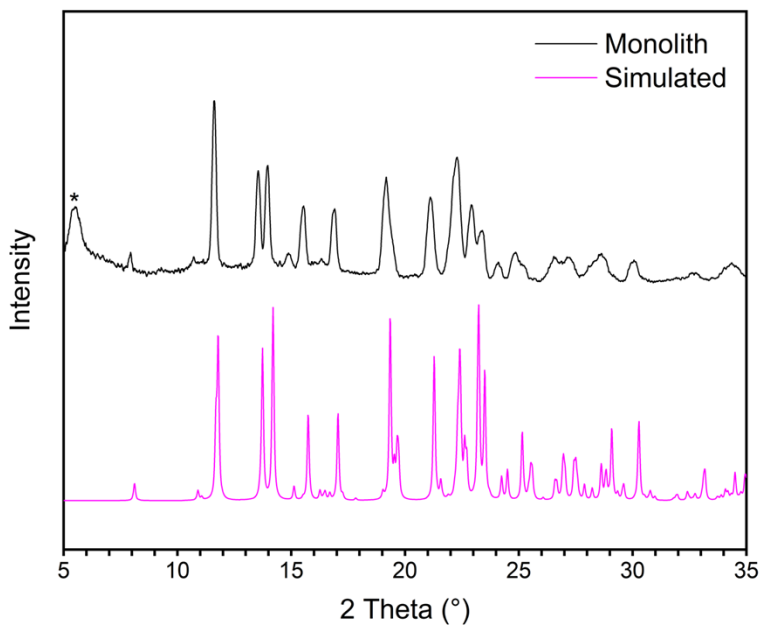

Figure S48: Comparison of Powder XRD pattern ( $\text{CuK}\alpha$  radiation,  $\lambda = 1.5418 \text{ \AA}$ ) from single crystal (simulated) and the monolith of  $\text{Mg}(\text{Diclo})_2(\text{biim-6})(\text{EtOH})_2$  (\*Kapton film).

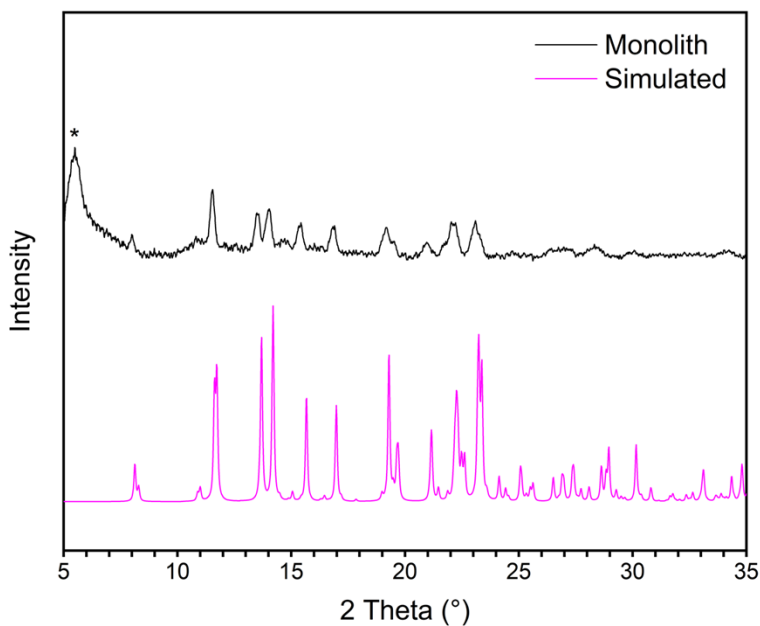

Figure S49: Comparison of Powder XRD pattern ( $\text{CuK}\alpha$  radiation,  $\lambda = 1.5418 \text{ \AA}$ ) from single crystal (simulated) and the monolith of  $\text{Mn}(\text{Diclo})_2(\text{biim-6})(\text{EtOH})_2$  (\*Kapton film).

#### 4. Thermogravimetric Analysis

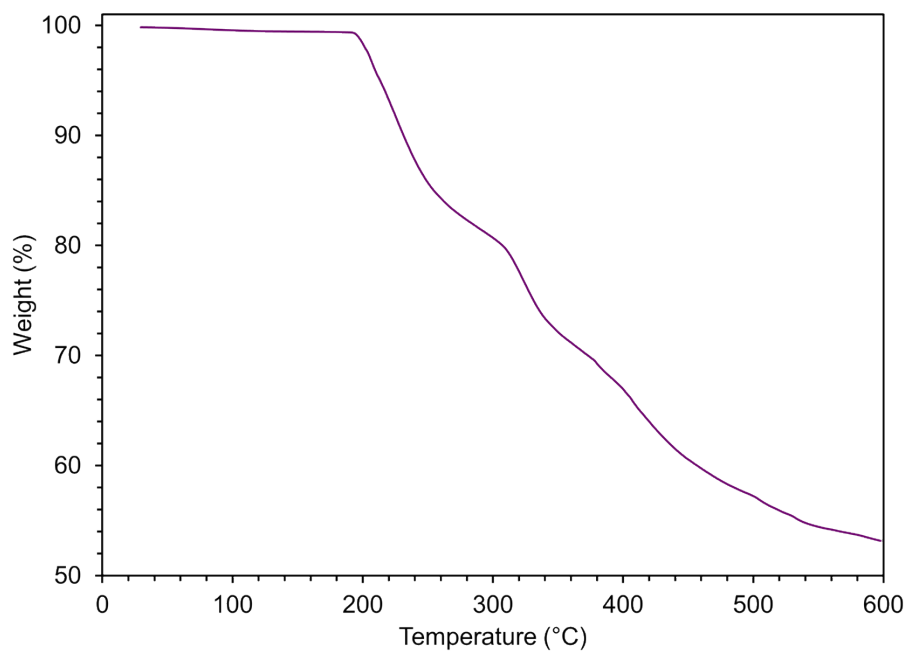

Figure S50: Thermogravimetric analysis  $\text{Cu}(\text{Diclo})_2(\text{biim-5})$ .

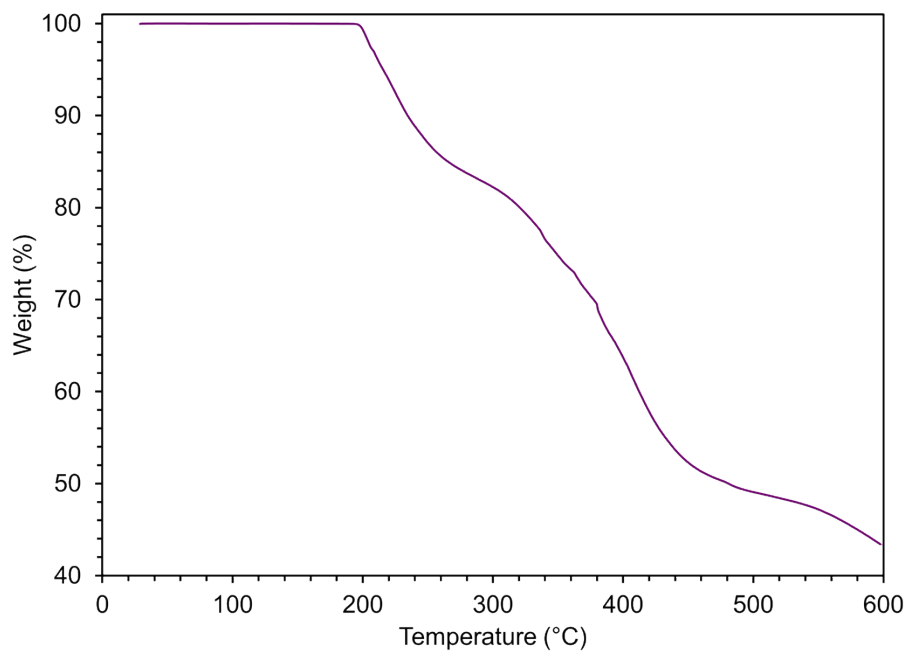

Figure S51: Thermogravimetric analysis of desolvated  $\text{Cu}(\text{Diclo})_2(\text{biim-6})'$ .

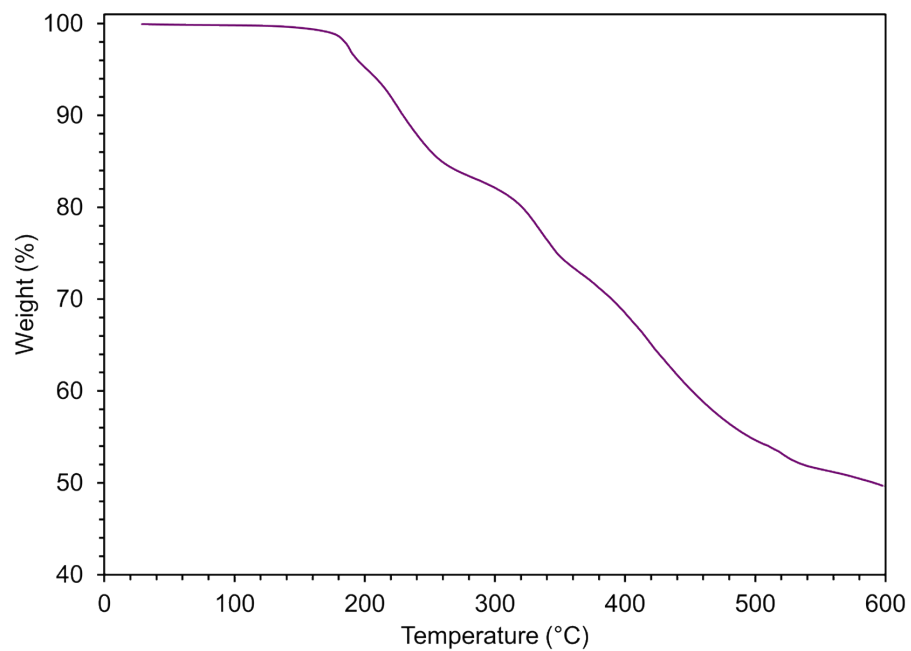

Figure S52: Thermogravimetric analysis of  $\text{Cu}(\text{Diclo})_2(\text{biim-8}) \cdot (\text{MeOH})_2$ .

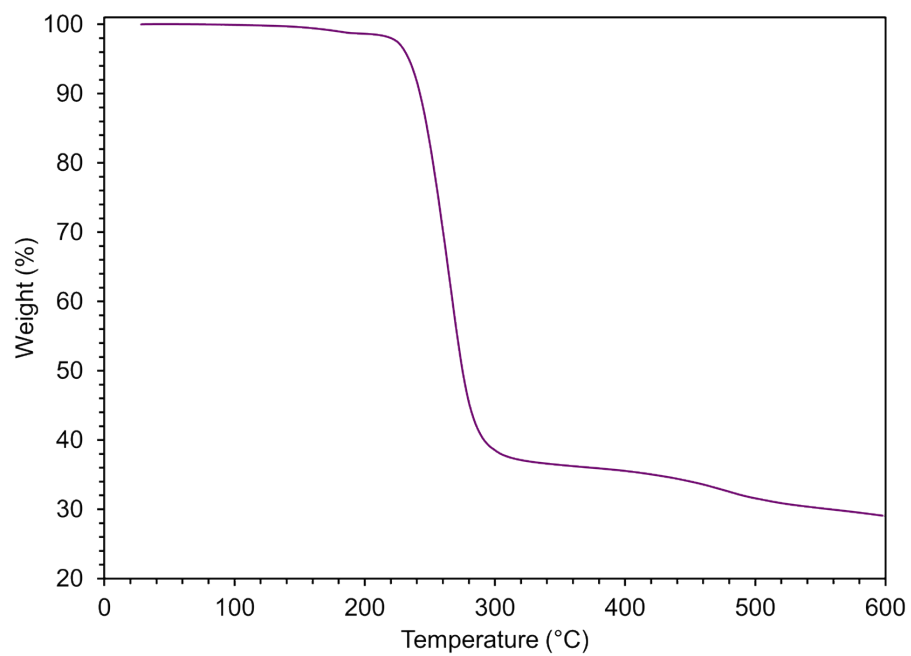

Figure S53: Thermogravimetric analysis  $\text{Zn}(\text{Diclo})_2(\text{biim-5})$ .

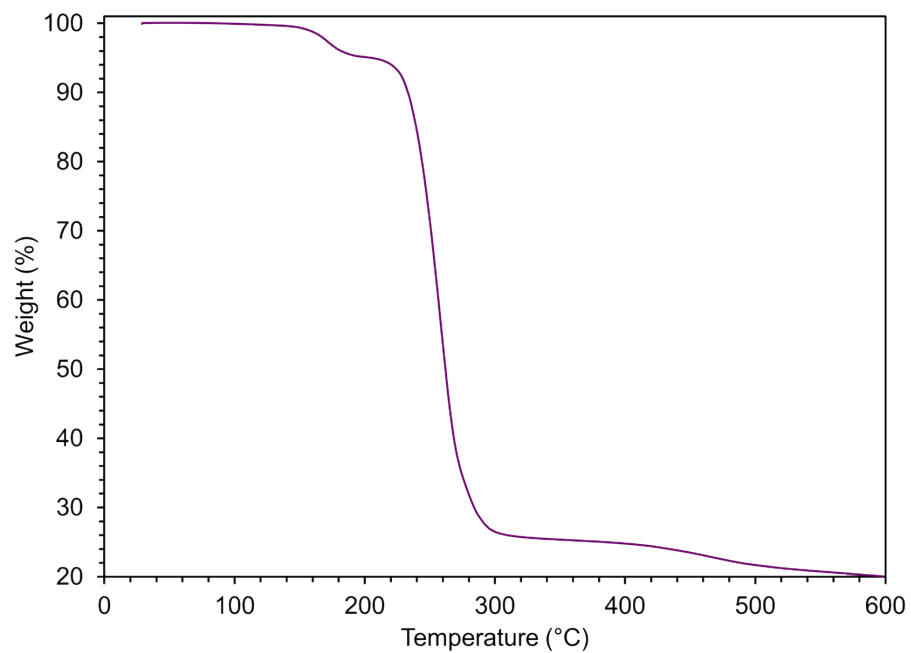

Figure S54: Thermogravimetric analysis  $\text{Zn}(\text{Diclo})_2(\text{biim-6}) \cdot (\text{MeOH})$ .

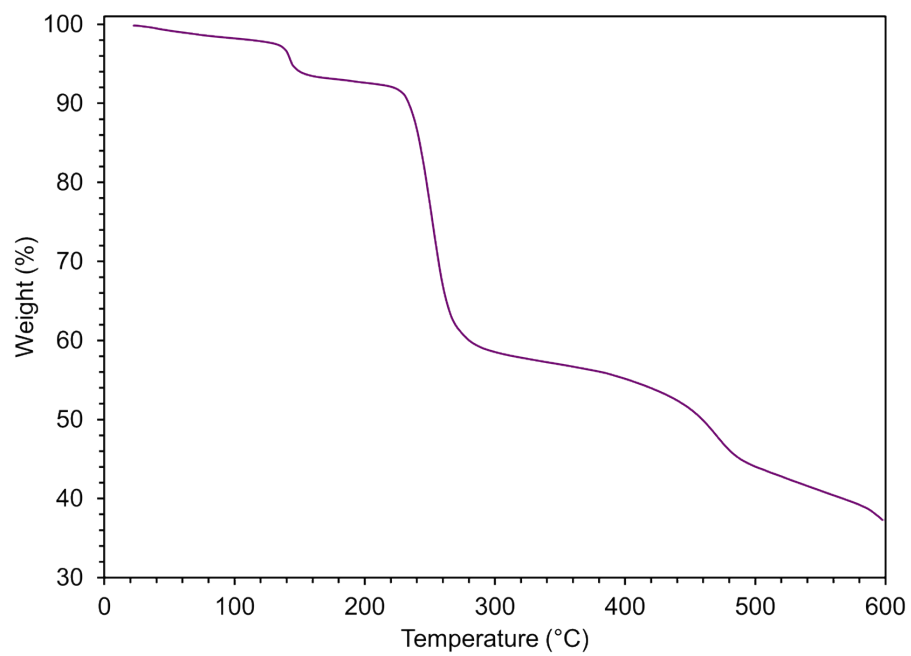

Figure S55: Thermogravimetric analysis of  $\text{Zn}(\text{Diclo})_2(\text{biim-6}) \cdot (\text{EtOH})$ .

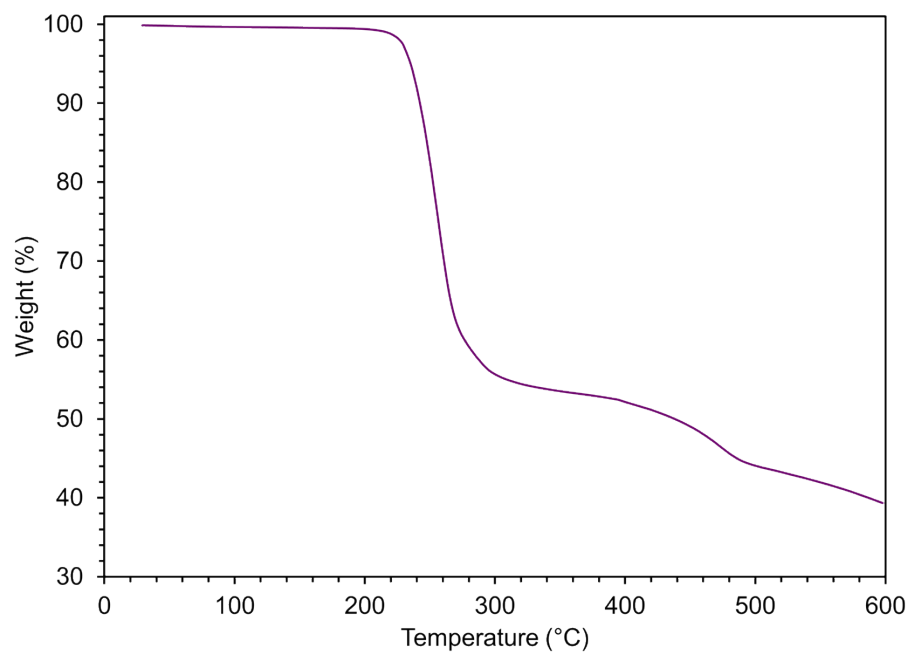

Figure S56: Thermogravimetric analysis of Zn(Diclo)<sub>2</sub>(biim-8).

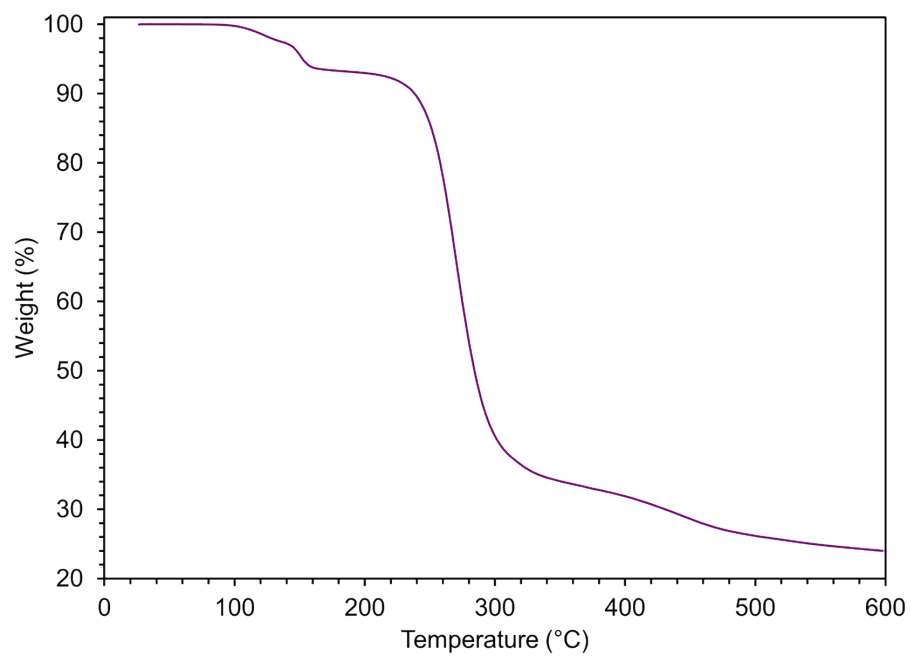

Figure S57: Thermogravimetric analysis of Mg(Diclo)<sub>2</sub>(biim-6)(MeOH)<sub>2</sub>.

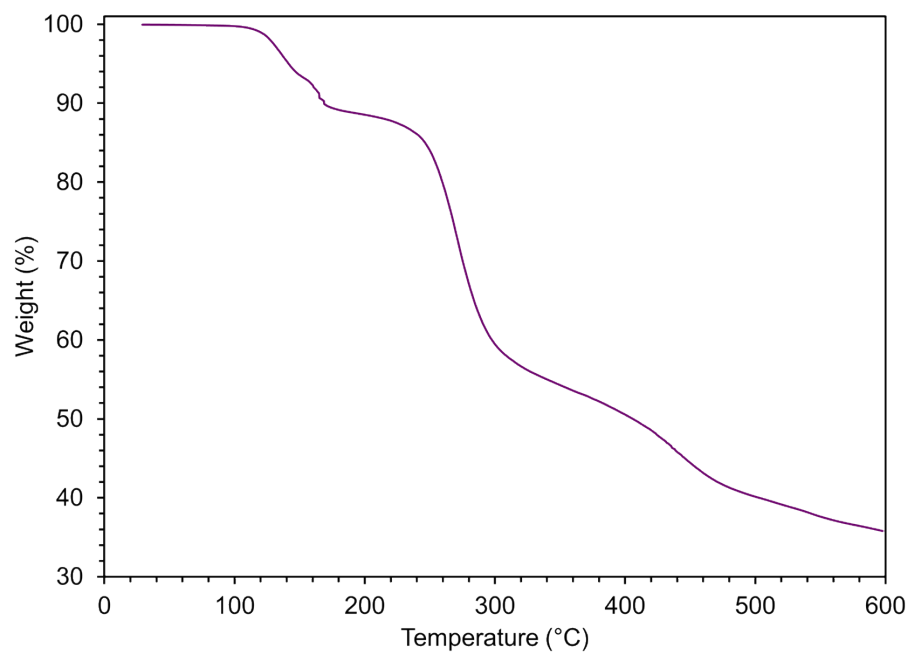

Figure S58: Thermogravimetric analysis of  $\text{Mg}(\text{Diclo})_2(\text{biim-6})(\text{EtOH})_2$ .

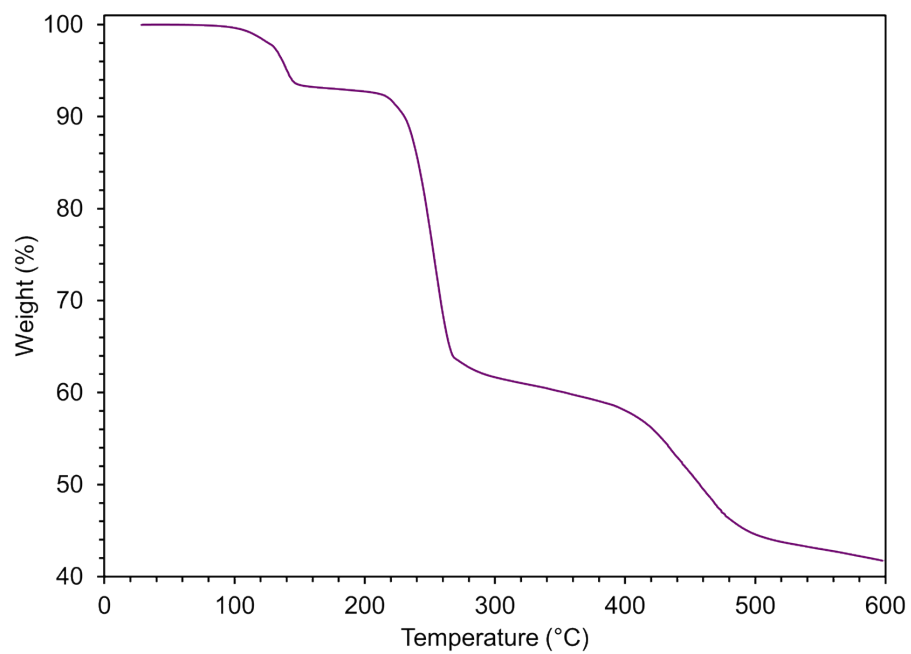

Figure S59: Thermogravimetric analysis of  $\text{Mn}(\text{Diclo})_2(\text{biim-6})(\text{MeOH})_2$ .



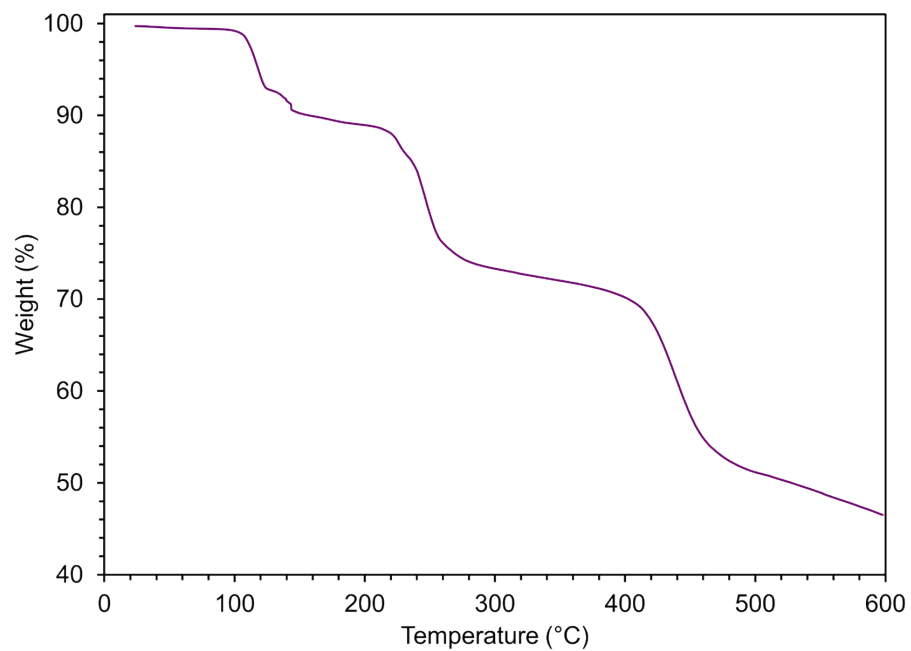

Figure S60: Thermogravimetric analysis of  $\text{Mn}(\text{Diclo})_2(\text{biim-6})(\text{EtOH})_2$ .

## 5. Dissolution Data

### 5.1 Calibration Curves

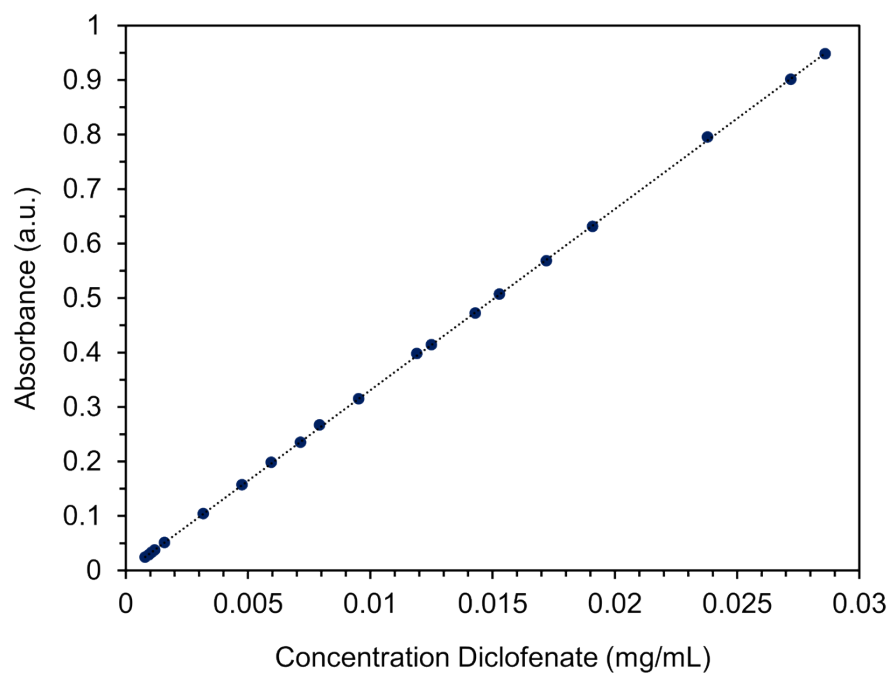

Figure S61: Calibration curve for sodium Diclofenac in 0.05 M phosphate buffer, pH 6.8  
 $y=33.248x-0.0015$ ,  $R^2 = 0.9999$

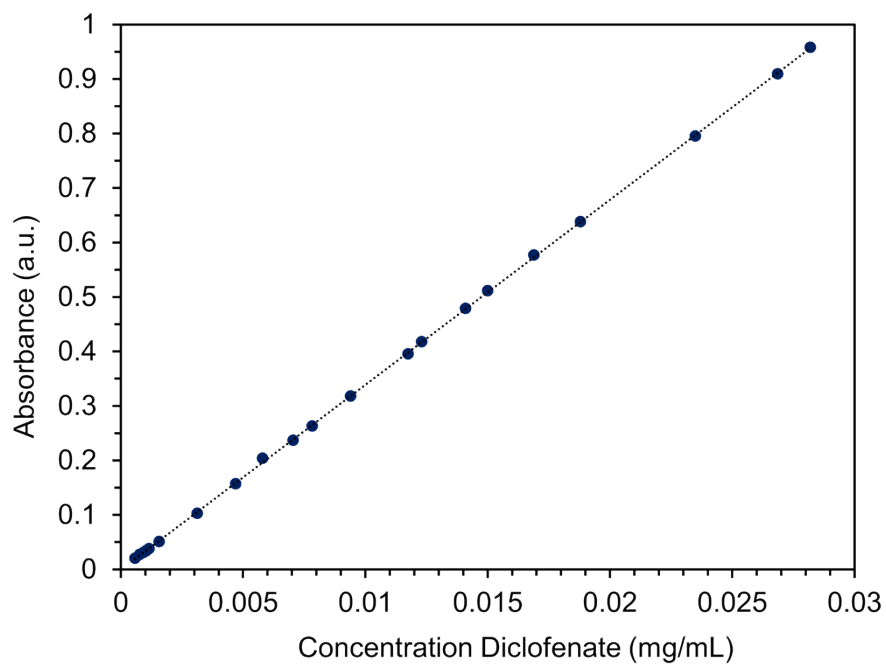

Figure S62: Calibration curve for sodium Diclofenac in 0.05 M phosphate buffer, pH 6.8 with 0.05% EDTA.  $y=33.955x-0.0007$ ,  $R^2 = 0.9999$ .

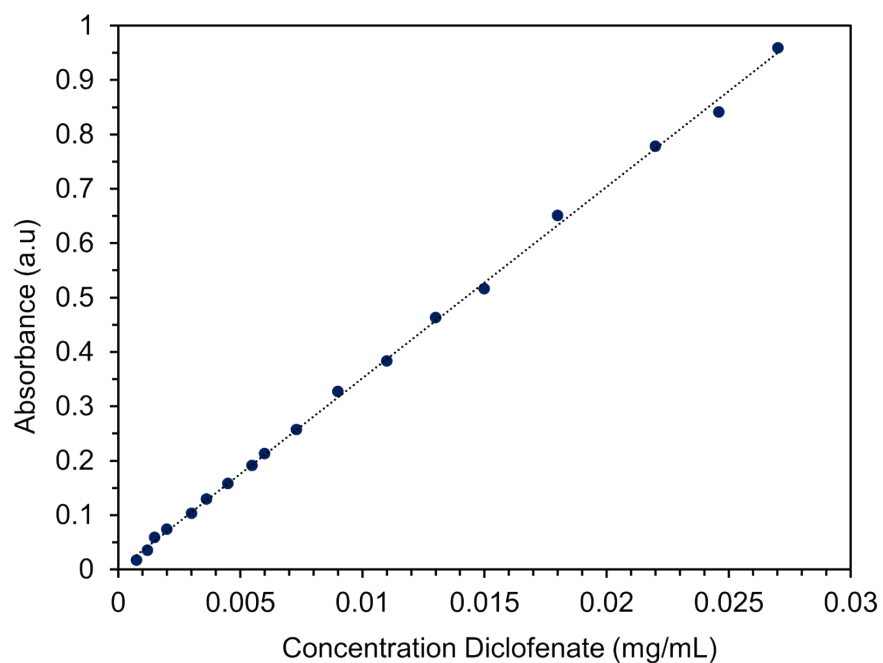

Figure S63: Calibration curve for sodium Diclofenac in 0.01 M citrate buffer, pH 5.5.  $y=35.19x-0.0002$ ,  $R^2 = 0.9990$ .

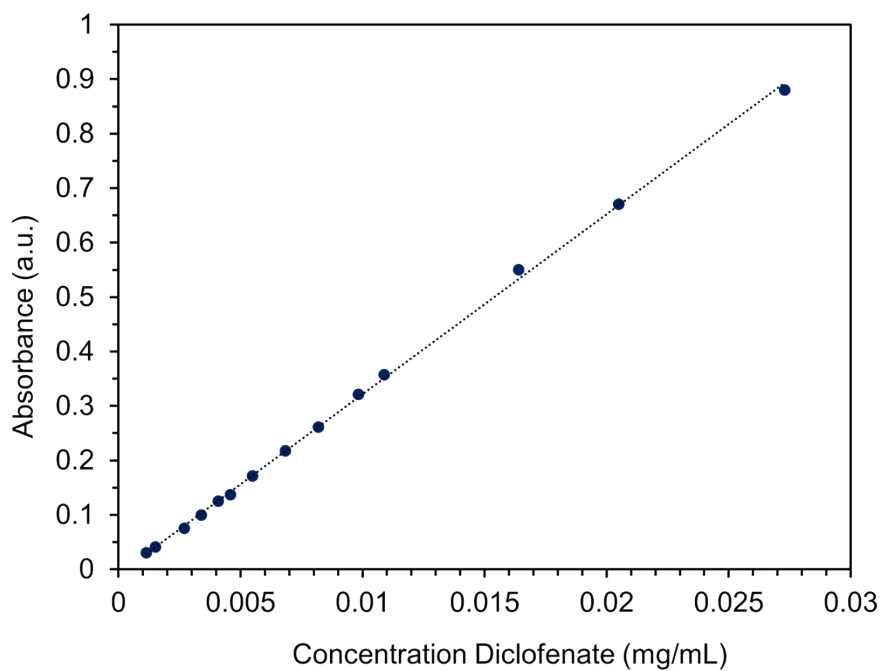

Figure S64: Calibration curve for sodium Diclofenac in 0.01 M citrate buffer, pH 5.5 with 0.05% SDS.  $y=33.059x-0.0093$ ,  $R^2 = 0.9993$ .

## 5.2 Tablet Dissolution

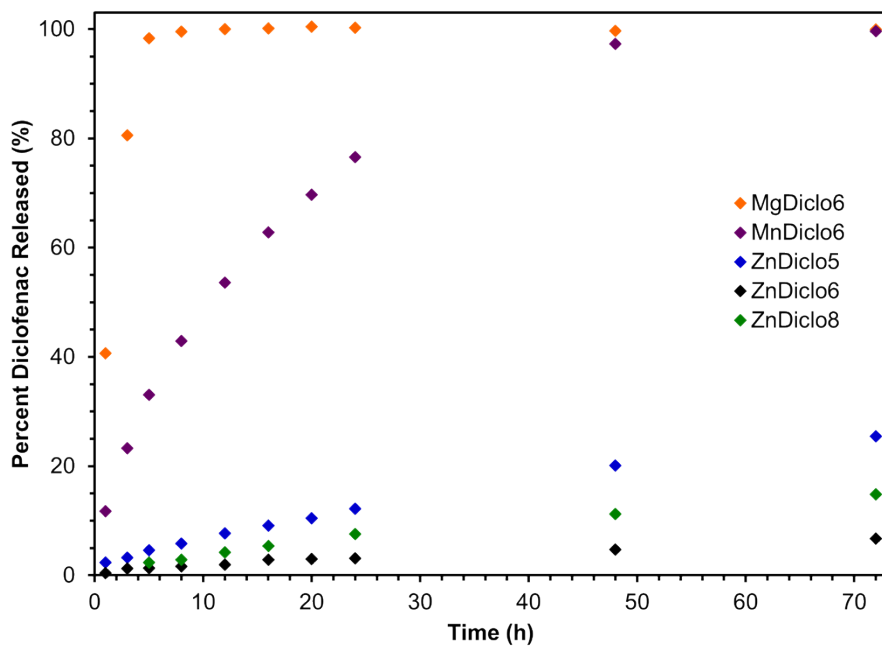

Figure S65: The release of Diclofenac from imidazole-based therapeutic coordination polymers over 72 h in 0.05 M phosphate buffer, pH 6.8.

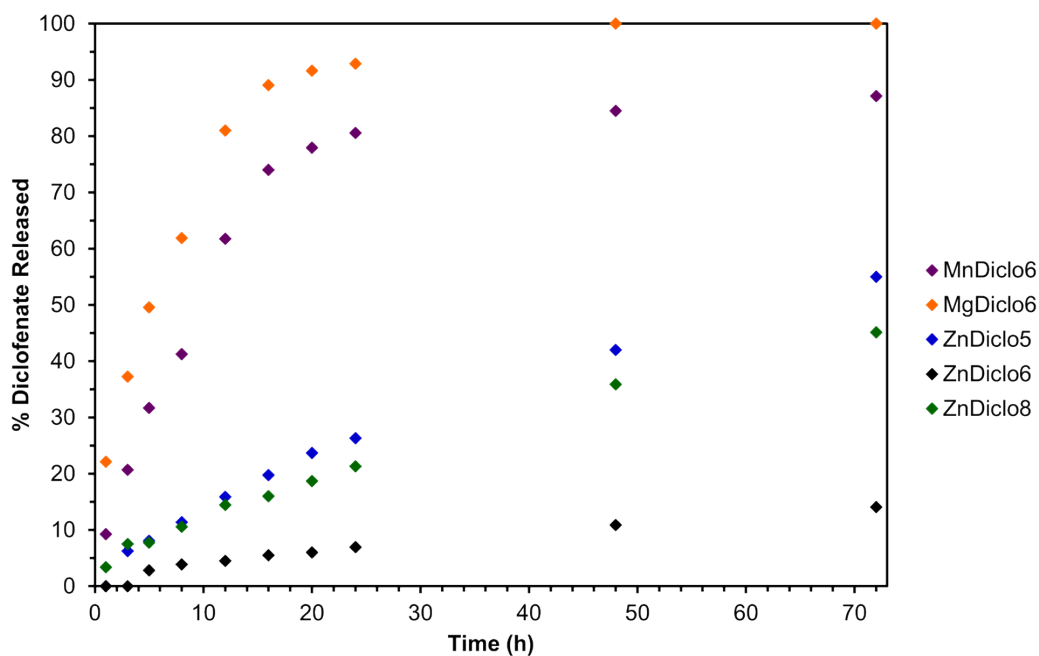

Figure S66: The release of Diclofenac from imidazole-based therapeutic coordination polymers over 72 h in 0.01 M citrate buffer, pH 5.5.

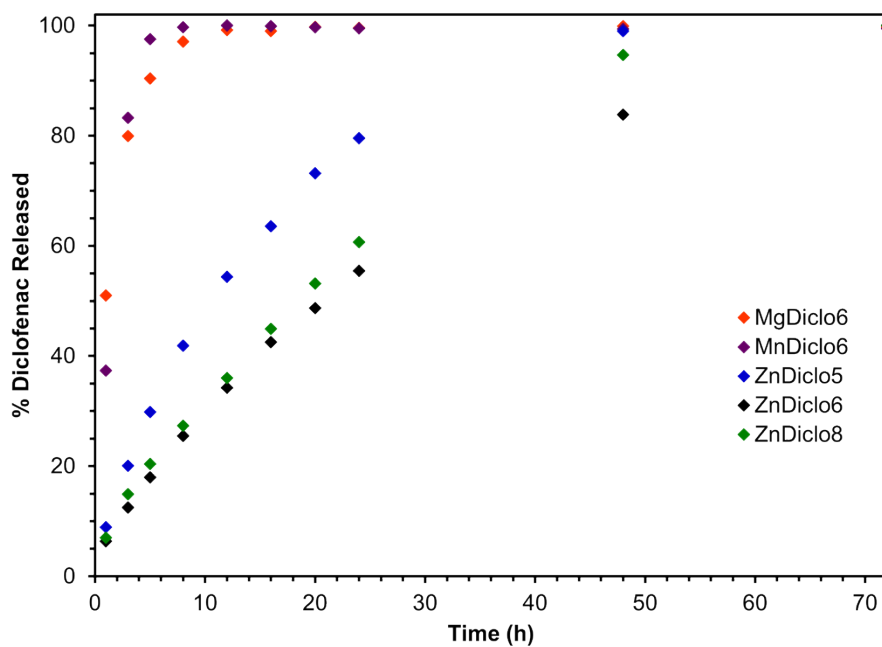

Figure S67: The release of Diclofenac from imidazole-based therapeutic coordination polymers over 72 h in 0.01 M citrate buffer, pH 5.5 with 0.05% SDS.

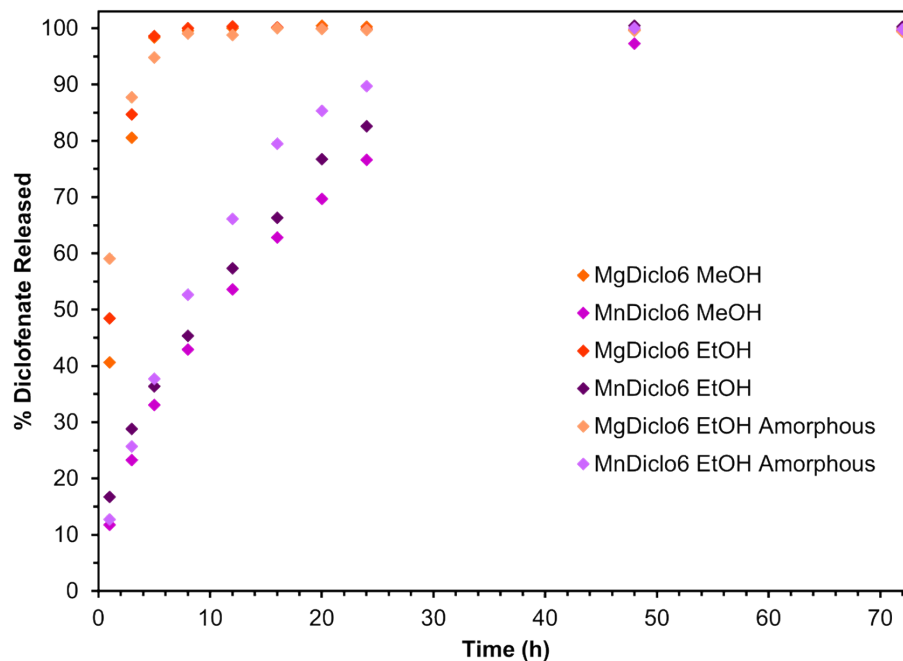

Figure S68: The release of Diclofenac from Mn and Mg therapeutic coordination polymers prepared in methanol, ethanol, and amorphized over 72 h in 0.05 M phosphate buffer, pH 6.8.

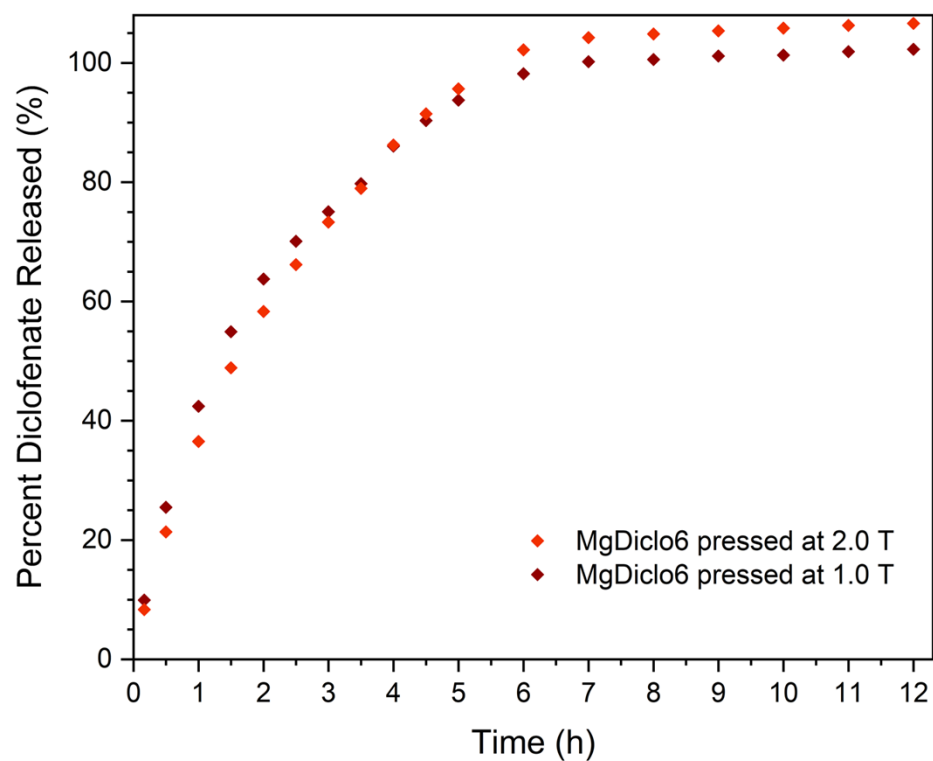

Figure S69: The release of Diclofenac from  $\text{Mg}(\text{Diclo})_2(\text{biim-6})(\text{EtOH})_2$  pressed into monoliths of 2 different pressures over 12 h in 0.05M phosphate buffer, pH 6.8.

### 5.3 Intrinsic Dissolution Rates

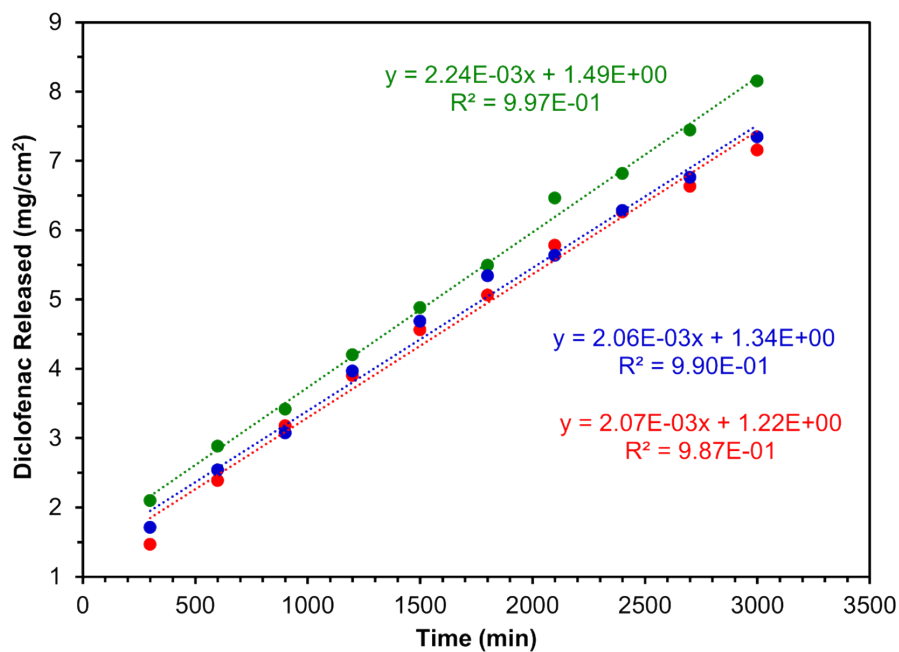

Figure S70: Intrinsic dissolution replicates of  $\text{Zn(Diclo)}_2(\text{biim-5})$  in 0.05 M phosphate buffer, pH 6.8. Linear fitting of data corresponds to the intrinsic dissolution rate. Linear equation and corresponding  $R^2$  values are shown in colors to match data sets.

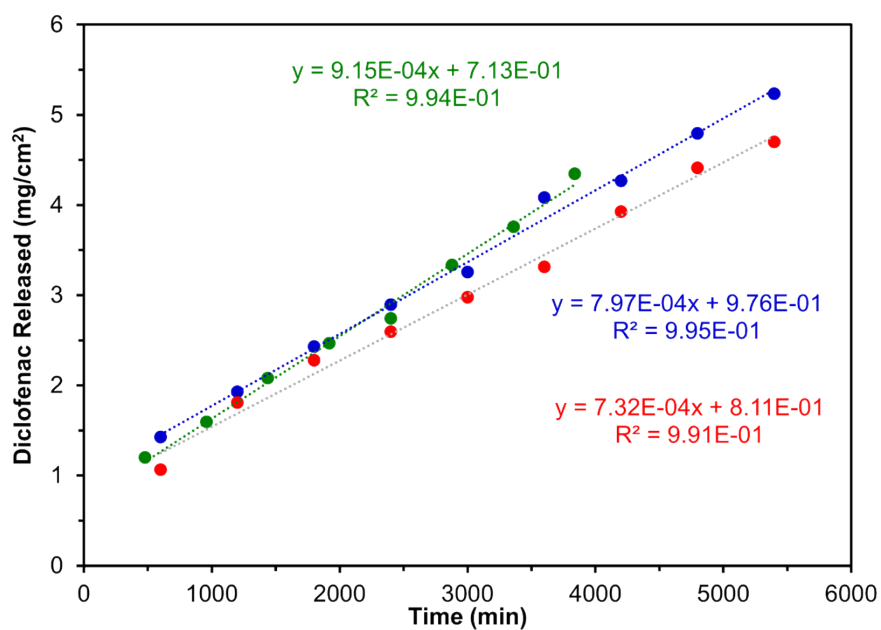

Figure S71: Intrinsic dissolution replicates of  $\text{Zn(Diclo)}_2(\text{biim-6}) \cdot (\text{EtOH})$  in 0.05 M phosphate buffer, pH 6.8. Linear fitting of data corresponds to the intrinsic dissolution rate. Linear equation and corresponding  $R^2$  values are shown in colors to match data sets.

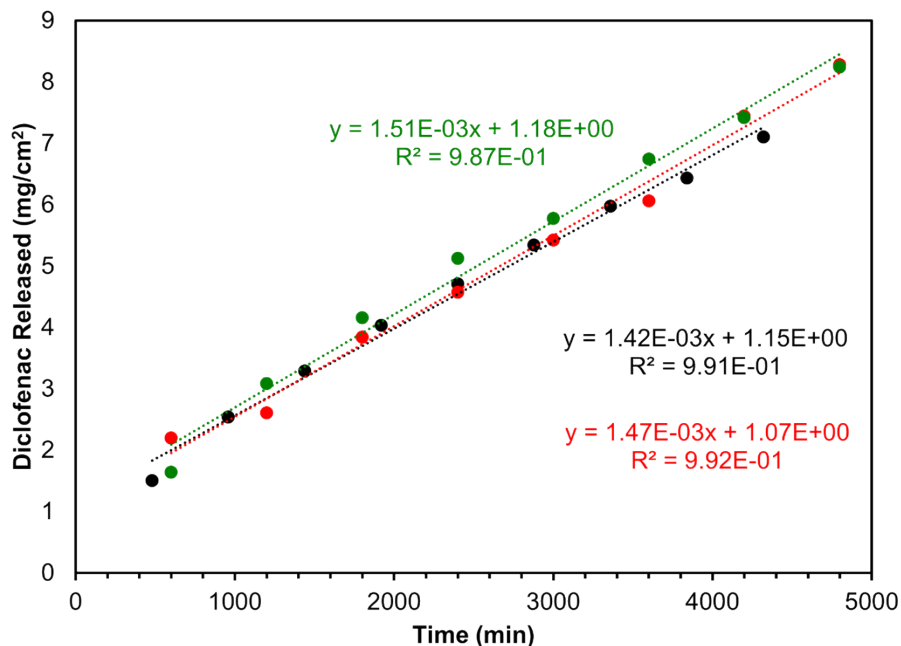

Figure S72: Intrinsic dissolution replicates of Zn(Diclo)<sub>2</sub>(biim-8) in 0.05 M phosphate buffer, pH 6.8. Linear fitting of data corresponds to the intrinsic dissolution rate. Linear equation and corresponding  $R^2$  values are shown in colors to match data sets.

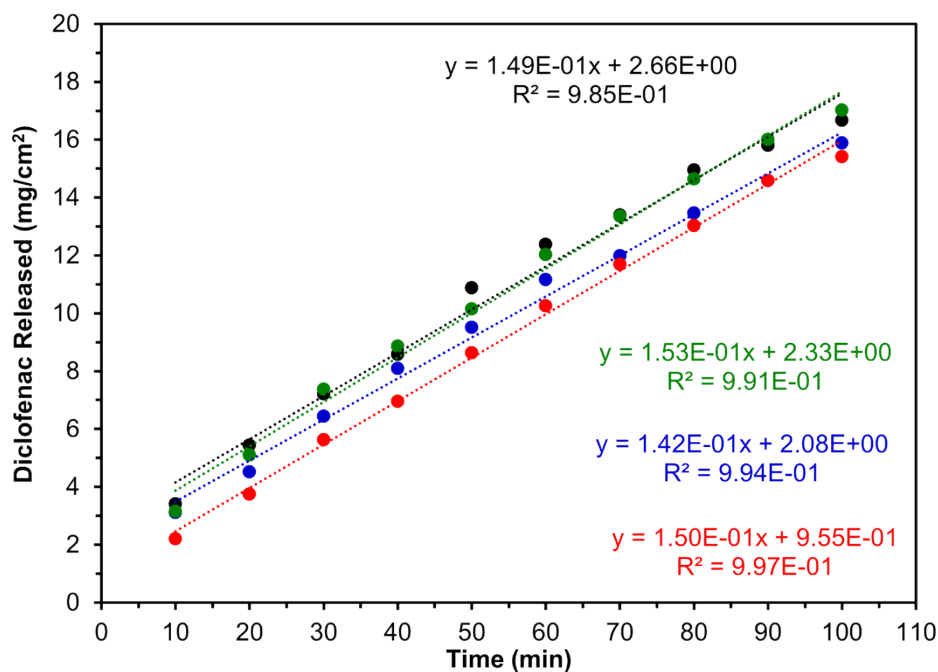

Figure S73: Intrinsic dissolution replicates of Mg(Diclo)<sub>2</sub>(biim-6)(EtOH)<sub>2</sub> in 0.05 M phosphate buffer, pH 6.8. Linear fitting of data corresponds to the intrinsic dissolution rate. Linear equation and corresponding  $R^2$  values are shown in colors to match data sets.



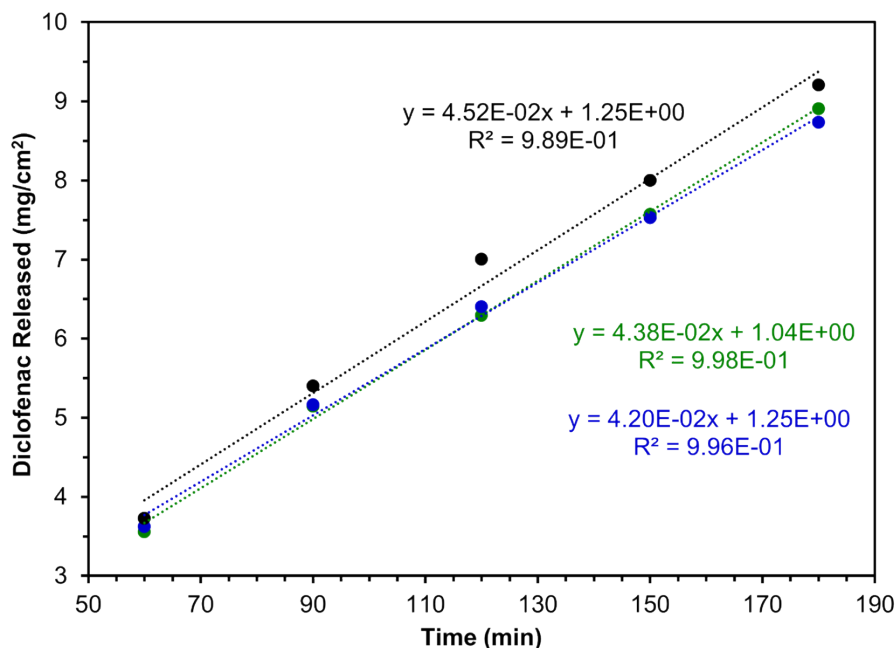

Figure S74: Intrinsic dissolution replicates of  $\text{Mn(Diclo)}_2(\text{biim-6})(\text{EtOH})_2$  in 0.05 M phosphate buffer, pH 6.8. Linear fitting of data corresponds to the intrinsic dissolution rate. Linear equation and corresponding  $R^2$  values are shown in colors to match data sets.

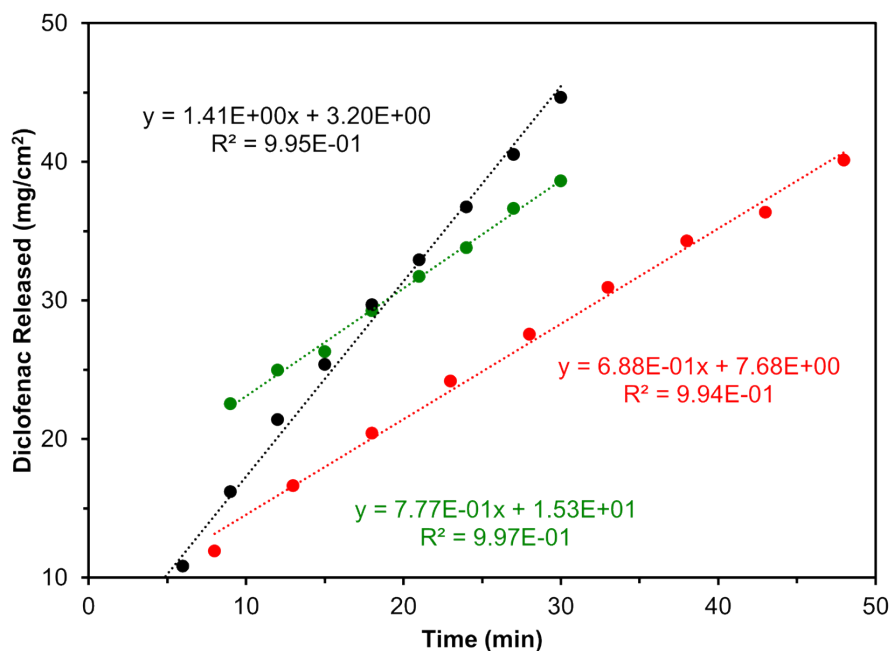

Figure S75: Intrinsic dissolution replicates of sodium Diclofenac in 0.05 M phosphate buffer, pH 6.8. Linear fitting of data corresponds to the intrinsic dissolution rate. Linear equation and corresponding  $R^2$  values are shown in colors to match data sets.

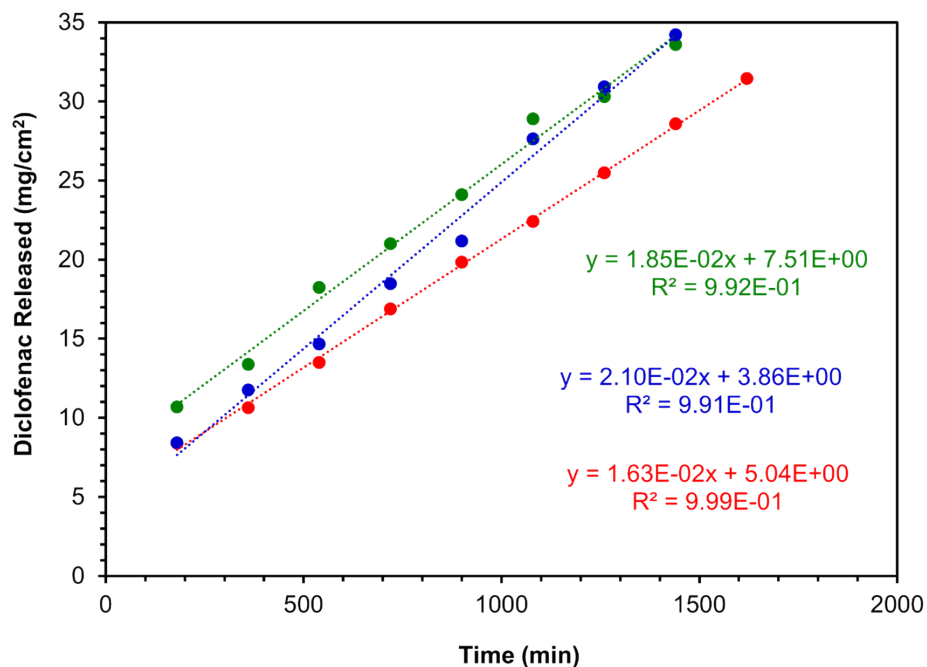

Figure S76: Intrinsic dissolution replicates of  $\text{Zn(Diclo)}_2(\text{biim-5})$  in 0.05 M phosphate buffer, pH 6.8 with 0.05% EDTA. Linear fitting of data corresponds to the intrinsic dissolution rate. Linear equation and corresponding  $R^2$  values are shown in colors to match data sets.

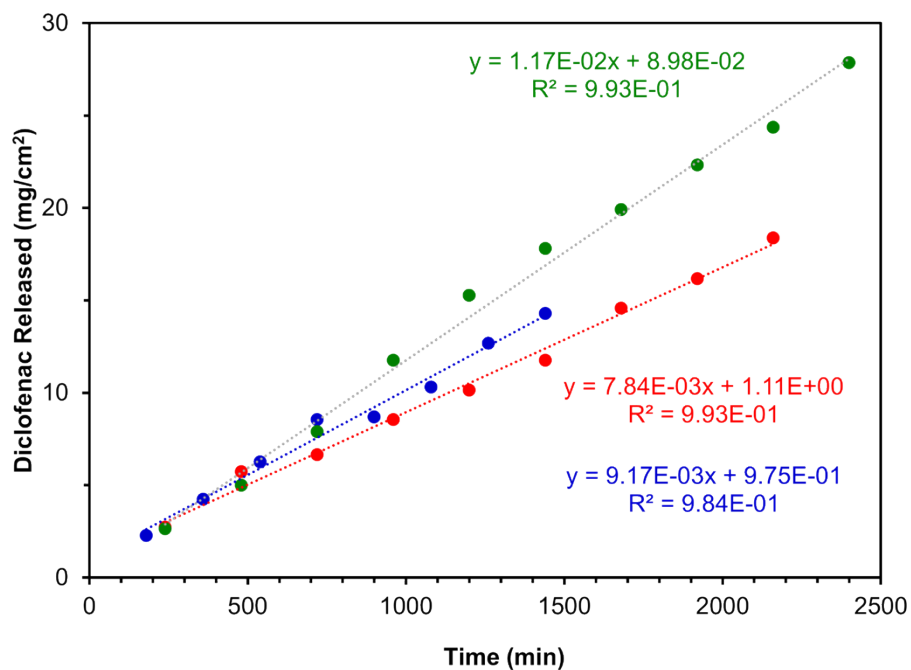

Figure S77: Intrinsic dissolution replicates of  $\text{Zn(Diclo)}_2(\text{biim-6}) \cdot (\text{EtOH})$  in 0.05 M phosphate buffer, pH 6.8 with 0.05% EDTA. Linear fitting of data corresponds to the intrinsic dissolution rate. Linear equation and corresponding  $R^2$  values are shown in colors to match data sets.

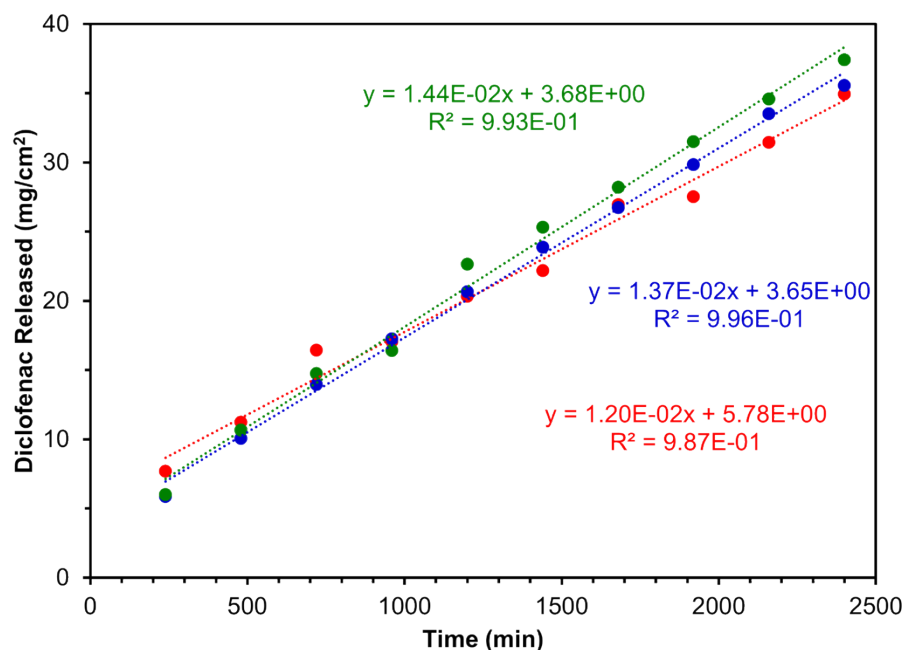

Figure S78: Intrinsic dissolution replicates of  $\text{Zn(Diclo)}_2(\text{biim-8})$  in 0.05 M phosphate buffer, pH 6.8 with 0.05% EDTA. Linear fitting of data corresponds to the intrinsic dissolution rate. Linear equation and corresponding  $R^2$  values are shown in colors to match data sets.

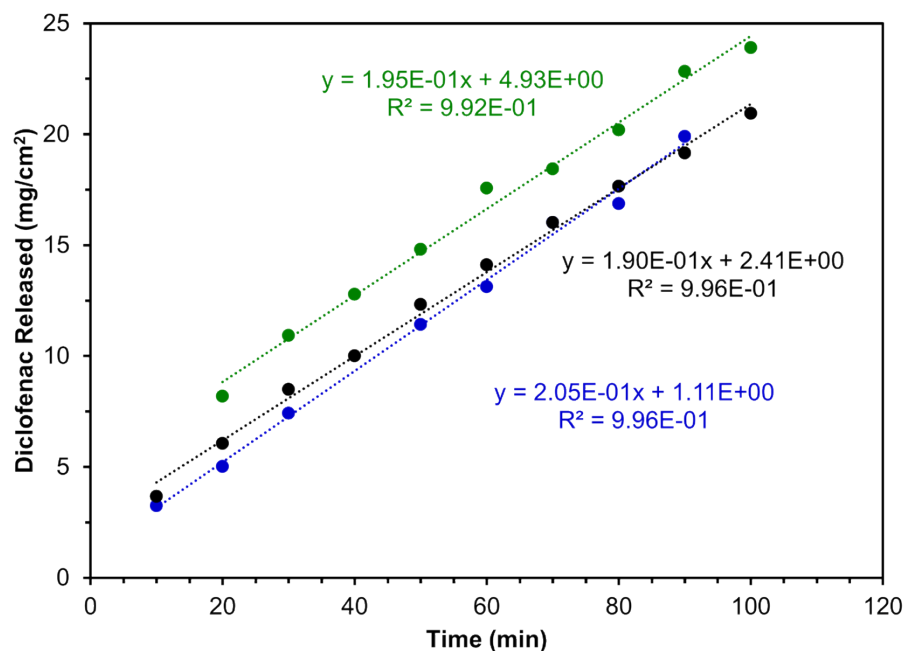

Figure S79: Intrinsic dissolution replicates of  $\text{Mg(Diclo)}_2(\text{biim-6})(\text{EtOH})_2$  in 0.05 M phosphate buffer, pH 6.8 with 0.05% EDTA. Linear fitting of data corresponds to the intrinsic dissolution rate. Linear equation and corresponding  $R^2$  values are shown in colors to match data sets.

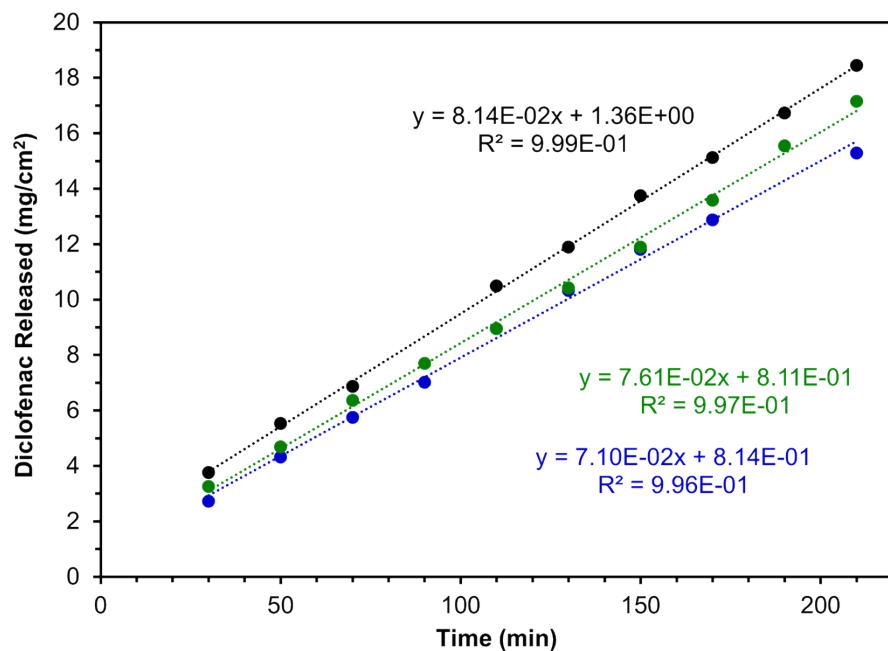

Figure S80: Intrinsic dissolution replicates of  $\text{Mn(Diclo)}_2(\text{biim-6})(\text{EtOH})_2$  in 0.05 M phosphate buffer, pH 6.8 with 0.05% EDTA. Linear fitting of data corresponds to the intrinsic dissolution rate. Linear equation and corresponding  $R^2$  values are shown in colors to match data sets.

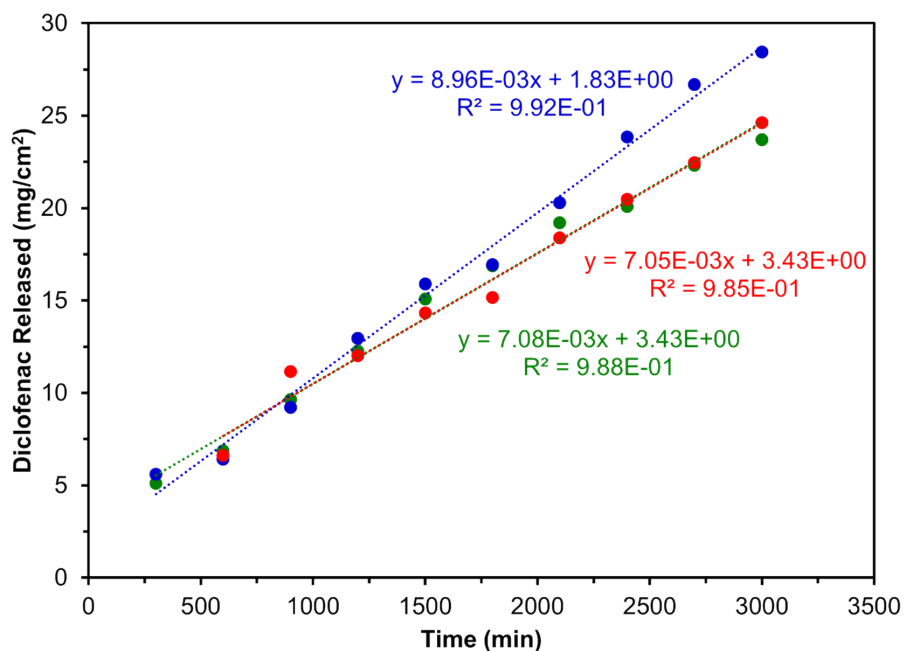

Figure S81: Intrinsic dissolution replicates of  $\text{Cu(Diclo)}_2(\text{biim-6})'$  in 0.05 M phosphate buffer, pH 6.8 with 0.05% EDTA. Linear fitting of data corresponds to the intrinsic dissolution rate. Linear equation and corresponding  $R^2$  values are shown in colors to match data sets.

## 6. Scanning Electron Microscopy (SEM)

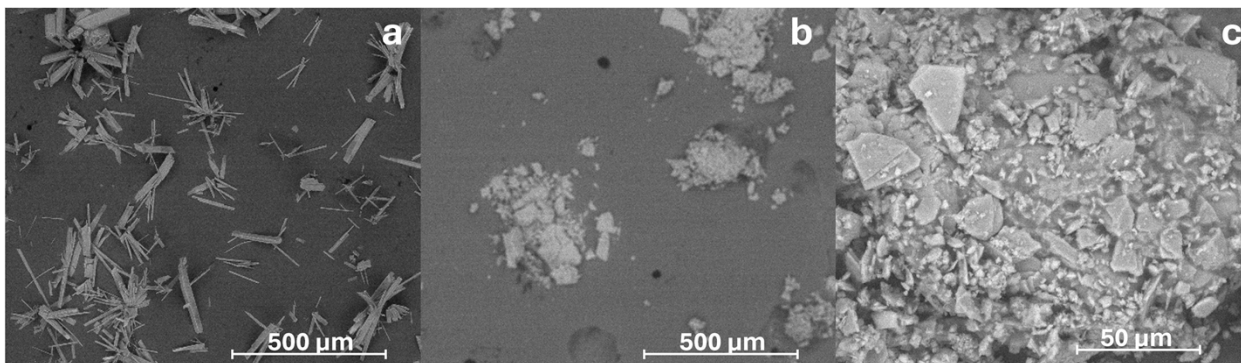

Figure S82. SEM images of  $\text{Cu}(\text{Diclo})_2(\text{biim-6})'$  a) as-synthesized and b,c) post-grinding. The particle size distribution in images b and c range from  $0.99\text{ }\mu\text{m}$  to  $96.25\text{ }\mu\text{m}$ .

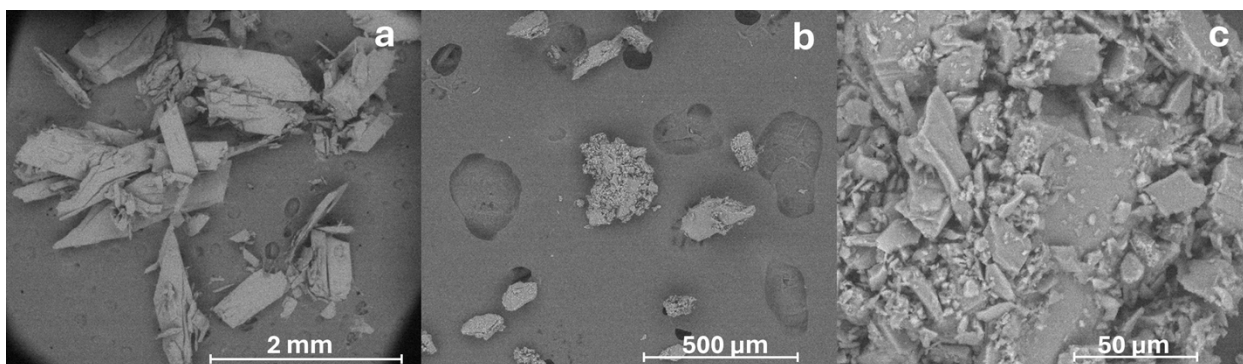

Figure S83. SEM images of  $\text{Mg}(\text{Diclo})_2(\text{biim-6})_2(\text{EtOH})_2$  a) as-synthesized and b,c) post-grinding. The particle size distribution of images b and c range from  $1.49\text{ }\mu\text{m}$  to  $389.63\text{ }\mu\text{m}$ .

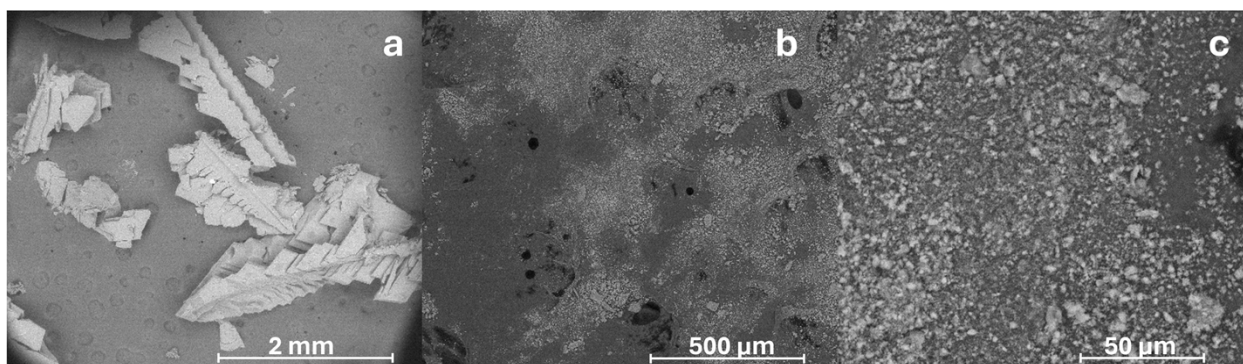

Figure S84. SEM images of  $\text{Mn}(\text{Diclo})_2(\text{biim-6})_2(\text{EtOH})_2$  a) as-synthesized and b,c) post-grinding. The particle size distribution in images b and c range from  $0.78\text{ }\mu\text{m}$  to  $14.97\text{ }\mu\text{m}$ .

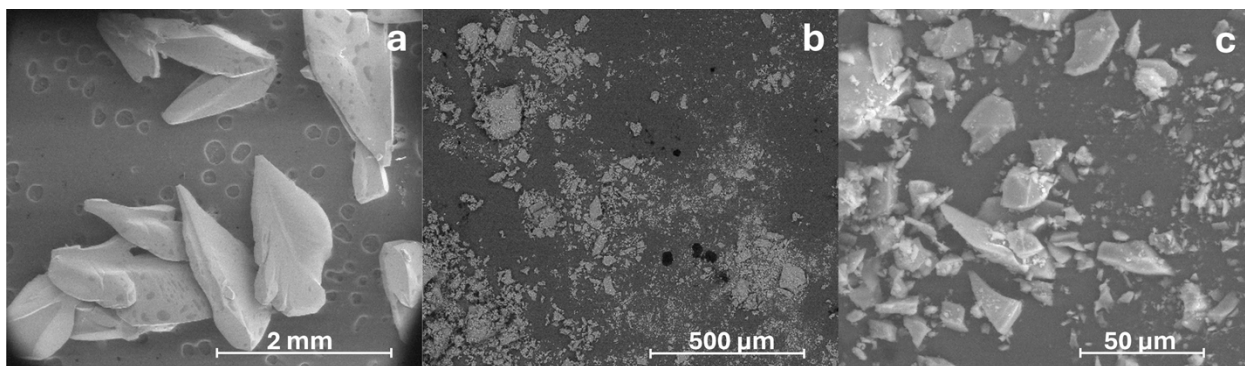

Figure S85. SEM images of  $\text{Zn(Diclo)}_2(\text{biim-6}) \cdot (\text{EtOH})$  a) as-synthesized and b,c) post-grinding. The particle size distribution in images b and c range from 0.55  $\mu\text{m}$  to 193.85  $\mu\text{m}$ .
